1 **Obesity promotes Fumonisin B1 toxicity and induces hepatitis**

2

3 Léonie Dopavogui<sup>1</sup>, Marion Régnier<sup>1</sup>, Arnaud Polizzi<sup>1</sup>, Quentin Ponchon<sup>1</sup>, Sarra  
4 Smati<sup>1,2</sup>, Wendy Klement<sup>1</sup>, Frédéric Lasserre<sup>1</sup>, Céline Lukowicz<sup>1</sup>, Yannick Lippi<sup>1</sup>, Anne  
5 Fougerat<sup>1</sup>, Justine Bertrand-Michel<sup>3</sup>, Claire Naylies<sup>1</sup>, Cécile Canlet<sup>1</sup>, Laurent Debrauwer<sup>1</sup>,  
6 Laurence Gamet-Payrastra<sup>1</sup>, Charlène Dauriat<sup>7</sup>, Josefina Casas<sup>4</sup>, Siska Croubels<sup>5</sup>, Siegrid De  
7 Baere<sup>5</sup>, Hester M. Burger<sup>6</sup>, Benoit Chassaing<sup>7</sup>, Sandrine Ellero-Simatos<sup>1</sup>, Hervé Guillou<sup>1</sup>,  
8 Isabelle P. Oswald<sup>1</sup>, Nicolas Loiseau<sup>1\*</sup>

9

10

11

12 <sup>1</sup> Toxalim (Research Centre in Food Toxicology), Université de Toulouse, INRAE,  
13 ENVT, INP-Purpan, UPS, Toulouse, France.

14 <sup>2</sup> L'institut du thorax, Inserm, CNRS, Univ Nantes, CHU Nantes, Nantes, France.

15 <sup>3</sup> INSERM I2MC, Toulouse, France

16 <sup>4</sup> Research Unit on BioActive Molecules (RUBAM), Department of Biological  
17 Chemistry, IQAC-CSIC, Barcelona, Spain & CIBEREHD, Madrid, Spain

18 <sup>5</sup> Department of Pathobiology, Pharmacology and Zoological Medicine, Faculty of  
19 Veterinary Medicine, Ghent University, Merelbeke, Belgium

20 <sup>6</sup> Unit of Research Integrity, Research Directorate, Cape Peninsula University of  
21 Technology, Bellville, South Africa

22 <sup>7</sup> INSERM U1016, Team "*Mucosal Microbiota in Chronic Inflammatory Diseases*",  
23 CNRS UMR 8104, Université Paris Cité, Paris, France

24

25

26 \* Correspondence and requests for materials should be addressed to:  
27 Dr. Nicolas Loiseau, PhD  
28 Toxalim UMR1331 INRAE/ENVT/INP/UPS  
29 180, Chemin de Tournefeuille, BP93173, 31027 Toulouse cedex 3 – France  
30 Tel: +33 (0)5 82 06 63 03 ; Fax: +33 (0)5 61 28 52 44  
31 Email: nicolas.loiseau@inrae.fr

32

33

34

35 **Abbreviations:**

36 FB1: Fumonisin B1

37

38 **Keywords:**

39 Fumonisin B1, Liver, Obesity, Diabetes, Steatosis, Steatohepatitis

40

41 **ABSTRACT**

42 Background and aim: Obesity is a major public health issue worldwide. Obesity is associated  
43 with chronic inflammation that contribute to long-term complications, including insulin  
44 resistance, type 2 diabetes and non-alcoholic fatty liver disease. We hypothesized that obesity  
45 may also influence the sensitivity to food contaminants, such as fumonisin B1 (FB1), a  
46 mycotoxin produced mainly by the *Fusarium verticillioides*. FB1, a common contaminant of  
47 corn, is the most abundant and best characterized member of the fumonisins family. This toxin  
48 provokes severe mycotoxicosis in animals, which leads to hepatotoxicity and alterations in the  
49 immune response and intestinal barrier permeability. We investigated whether diet-induced  
50 obesity could modulate the sensitivity to oral FB1 exposure, with emphasis on gut health and  
51 hepatotoxicity.

52 Methods: The metabolic effects of FB1 were assessed in obese and non-obese male C57BL/6J  
53 mice. For 15 weeks, mice received a high-fat diet (HFD) or normal chow diet (CHOW). During  
54 the last three weeks, mice were exposed or not to FB1 (10 mg/kg body weight/day) through  
55 drinking water.

56 Results: As expected, HFD feeding induced significant body weight gain, glucose intolerance,  
57 and hepatic steatosis. FB1-exposed mice displayed a higher sphinganine/sphingosine ratio, a  
58 well-known FB1 biomarker of exposure, due to inhibition of ceramide synthases activity by  
59 FB1. Combined exposure to HFD and FB1 resulted in body weight loss and a decrease in fasting  
60 blood glucose level. This co-exposition also induces gut dysbiosis, an increase in plasma FB1  
61 level, a decrease in liver weight and hepatic steatosis. Moreover, plasma transaminase levels  
62 were significantly increased and associated with liver inflammation in HFD/FB1-treated mice.  
63 Liver gene expression analysis revealed that the combined exposure to HFD and FB1 was  
64 associated with reduced expression of genes involved in lipogenesis and increased expression  
65 of immune response and cell cycle-associated genes.

66 Conclusion: These results suggest that, in the context of obesity, FB1 exposure promotes gut  
67 dysbiosis and severe liver inflammation. To our knowledge, this study provides the first  
68 example of obesity-induced hepatitis in response to a food contaminant.

69

## 70 **1. Introduction**

71           The prevalence of obesity has reached 13% of the adult population worldwide, and 39%  
72 of the world's adult population is considered overweight (WHO, 2021). Therefore, obesity is  
73 considered as an epidemic disease and represents a major public health burden worldwide.  
74 Obesity promotes many other diseases, such as type 2 diabetes, cardiovascular diseases, and  
75 non-alcoholic fatty liver disease (NAFLD). Obesity fosters disease development through a  
76 combination of metabolic changes (Cirulli et al., 2018) and chronic low-grade inflammation  
77 (Rohm et al., 2022). Obesity is highly linked to lifestyle and the environment. High-caloric-  
78 density diets and reduced physical activities are thought to play an important role in the  
79 development of this epidemic. In addition to genetic factors, many environmental factors  
80 influence obesity (Pillon et al., 2021), including xenobiotics, endocrine disruptors (Sun et al.,  
81 2022), and other food additives (Chassaing et al., 2015; Suez et al., 2014). Although there is  
82 increasing evidence that food contaminants can impact the development of obesity, very few  
83 studies have investigated the influence of obesity on the sensitivity to food contaminants.

84           Mycotoxins are fungal toxins that contaminate animal feed and human food worldwide;  
85 thus, they cause significant veterinary and public health issues. *Fusarium* spp. is among the  
86 most frequent of the fungal genera found in different cereal crops; it causes economic loss and  
87 food safety concerns, because it reduces the cereal yield and quality (Cano et al., 2016).  
88 Moreover, climate change has led to shifts in temperature and humidity conditions, which favor  
89 *Fusarium* dissemination (Nnadi et al., 2021). Fumonisin is the predominant mycotoxin  
90 produced by *Fusarium* spp., and fumonisin B1 (FB1) is the most prevalent and the most  
91 documented member of this family (Knutsen et al., 2018a). In 2007, the European Union set  
92 recommendations and regulations (Commission Recommendation 2006 [Ec] No 576/2006;  
93 Commission Regulation 2007 [Ec] No 1126/2007) for the maximum levels of fumonisins (sum  
94 of FB1 and FB2) allowed in animal feed (from 5 mg/kg for pig feed to 50 mg/kg for adult

95 ruminant feed) and human foodstuffs (from 0.2 mg/kg for baby foods to 4 mg/kg for  
96 unprocessed maize).

97         FB1 exposure induces severe mycotoxicosis in pigs (Knutsen et al 2018b), with diverse  
98 clinical symptoms. The most common symptoms are nephrotoxicity, hepatotoxicity (Terciolo  
99 et al., 2019), immunotoxicity (Devriendt et al., 2009; Halloy et al., 2005), and intestinal barrier  
100 function disturbances (Bouhet et al., 2006; Loiseau et al., 2007). To date, the known molecular  
101 mechanisms underlying FB1 toxicity are mostly related to its inhibitory effect on sphingolipid  
102 biosynthesis (Wang et al., 1991; Chen et al., 2021). Indeed, FB1 and sphingoid long-chain bases  
103 share similar structural backbone features. The inhibition of ceramide synthase increases free  
104 sphinganine levels and reduces the abundance of complex sphingolipids and ceramides  
105 (Loiseau et al., 2007). This effect results in elevating the ratio of free sphingoid bases  
106 (sphinganine/sphingosine, Sa/So) in several tissues (e.g., liver and intestine), in plasma, and in  
107 cell lines (Grenier et al., 2012; Riley et al., 1993).

108         Previous studies from our group showed that FB1 had a significant influence on lipid  
109 metabolism (Régnier et al., 2017; Régnier et al., 2019). Therefore, the current study aimed to  
110 investigate the effect of obesity on FB1 toxicity. We fed mice a high-fat diet (HFD) to induce  
111 obesity *in vivo*. Next, we investigated the systemic effects through the evolution of the gut  
112 microbiota ecology balance and the hepatic responses to FB1 exposure, in both normal-weight  
113 and obese mice. Our work showed that obesity enhanced FB1 plasma levels, which strongly  
114 impacted mouse metabolism. In obese mice, FB1 exposure reduced glucose intolerance and  
115 reduced steatosis, but promoted severe hepatitis.

116

## 117 **2. Materials and methods**

## 118 **2.1 Animals, diet, and exposure to FB1**

119 All experiments were carried out in accordance with the European Guidelines for the  
120 Care and Use of Animals for Research Purposes. The animal study protocol was approved by  
121 an independent ethics committee (CEEA-86 Toxcométhique) under the authorization number  
122 2016070116429578. The animals were treated humanely with due consideration to the  
123 alleviation of distress and discomfort. Mouse housing was controlled for temperature (21-23°C)  
124 and light (12 h light/12 h dark). A total of 48 C57BL/6J male mice (6 weeks old) were purchased  
125 from Charles Rivers Laboratories (L'Arbresle, France). Mice were allowed two weeks of  
126 acclimatization with free access and *ad libitum* water and food, with a standard rodent diet (safe  
127 04 U8220G10R) from SAFE (Augy, France). Then, the mice were randomly divided into four  
128 groups of 12 mice each. Two groups (n=24, 4 cages of 6 mice) were fed a chow diet with 10  
129 kcal% fat (CHOW, D12450J, Research Diets) and the other two groups (n=24, 4 cages of 6  
130 mice) were fed a high-fat diet with 60 kcal% fat (HFD, D12492, Research Diets) for 15 weeks.  
131 After 12 weeks of feeding, half of the CHOW (n=12, 2 cages of 6 mice) and HFD (n=12, 2  
132 cages of 6 mice) groups were exposed to FB1 (10 mg/kg bw/day) by adjusting every two days  
133 the amount of consumed FB1 in the drinking water during 3 weeks in order to maintain a  
134 constant level of exposure. Every week, mice were weighed, and water consumption was  
135 measured to adjust the quantity of FB1 in the water. Food intake was also monitored. At the  
136 end of the experiment, mice were sacrificed to collect plasma and tissue samples.

## 137 **2.2 Blood and tissue sampling**

138 After 15 weeks of feeding, mice were fasted for 6 h, and blood glucose levels were  
139 measured from the tail vein with an AccuCheck Performa glucometer (Roche Diagnostics). At  
140 the end of the experiment, blood was collected into EDTA-coated tubes (BD Microtainer, K2E  
141 tubes) from the submandibular vein. Plasma was isolated by centrifugation (1500 ×g for 10 min  
142 at 4°C) and stored at -80°C until use for plasma biochemistry. All mice were sacrificed, on the

143 day 104, in the fed state. Following sacrifice by cervical dislocation, liver and caecum were  
144 removed, weighed, prepared for histology analysis or snap frozen in liquid nitrogen and stored  
145 at  $-80^{\circ}\text{C}$ .

### 146 **2.3 Plasma FB1 Analysis**

147 Equal volumes of plasma of 4 individual mice from each group were pooled and 100  $\mu\text{l}$   
148 was used for analysis. Considering this pooling of samples, only 3 FB1 level analysis have been  
149 performed per group. Plasma FB1 was analyzed with a validated UPLC-MS/MS (ultra-  
150 performance liquid chromatography-tandem mass spectrometry) method previously described  
151 (De Baere et al., 2018). The FB1 analytical standard was provided by Fermentek Ltd  
152 (Jerusalem, Israel). The limit of quantification was determined at 0.5 ng/ml, using 100  $\mu\text{l}$  of  
153 plasma. The limit of detection, corresponding to a signal-to-noise value of 3/1, was 0.09 ng/ml.  
154

### 155 **2.4 Biochemical analyses**

156 We analyzed the following plasma constituents: alanine aminotransferase (ALT),  
157 aspartate aminotransferase (AST), alkaline phosphatase (ALP), bilirubin, creatinine,  
158 triglycerides, total cholesterol, high density lipoprotein, and low-density lipoprotein  
159 cholesterol. All biochemical analyses were performed with a COBASMIRA+ by the Anexplo  
160 technical platform team (I2MC, Rangueil, Toulouse).

### 161 **2.5 Lipid extraction and analysis**

162 Liver samples were homogenized in Lysing Matrix D tubes with 1 ml of methanol/5  
163 mM EGTA (2:1 v/v) in a FastPrep machine (MPBiochemicals). Lipids corresponding to an  
164 equivalent of 2 mg of tissue were extracted according to Bligh and Dyer, in  
165 chloroform/methanol/water (2.5:2.5:2, v/v/v), in the presence of the following internal



166 standards: glyceryl trinonadecanoate, stigmasterol, and cholesteryl heptadecanoate (Sigma,  
167 Saint-Quentin-Fallavier, France). Total lipids were suspended in 160  $\mu$ l ethyl acetate, and the  
168 triglycerides, free cholesterol, and cholesterol ester components were analyzed with FID gas-  
169 chromatography on a focus Thermo Electron system with a Zebron-1 Phenomenex fused-silica  
170 capillary column (5 m, 0.32 mm i.d., 0.50 mm film thickness). The oven temperature was  
171 programmed to increase from 200 to 350°C at a rate of 5°C/min, and the carrier gas was  
172 hydrogen (0.5 bar). The injector and the detector were at 315°C and 345°C, respectively.

173 Liver ceramide, sphingomyelin, sphingosine, and sphinganine were extracted, as  
174 previously described (Barbacini et al., 2019), with chloroform/water/methanol (2.5:1:5 v/v/v)  
175 in the presence of the following internal standards: ceramide d18:1/12:0 (16 ng), sphingomyelin  
176 d18:1/12:0 (16 ng), sphingosine 17:0, and sphinganine 17:0 and sphingosine-1-phosphate 17:0.  
177 Sphingolipids and internal standards were analyzed by liquid chromatography mass  
178 spectrometry (LC-MS) with an Acquity ultra high-performance liquid chromatography  
179 (UHPLC) system (Waters, USA) connected to a Time of Flight (LCT Premier XE, Waters,  
180 USA) Detector or a triple quadrupole mass spectrometer (Xevo, Waters, USA). The final data  
181 were calculated as pmol/mg of protein.

## 182 **2.6 Proton nuclear magnetic resonance (<sup>1</sup>H-NMR)-based metabolomics**

183 <sup>1</sup>H NMR spectroscopy was performed on aqueous liver extracts prepared from liver  
184 samples (50–75 mg). Briefly, livers were homogenized in chloroform/methanol/NaCl 0.9%  
185 (2/1/0.6, v/v/v) containing 0.1% butyl hydroxytoluene. Homogenates were centrifuged at 5,000  
186  $\times$ g for 10 min. The supernatant was collected, lyophilized, and reconstituted in 600  $\mu$ l of D<sub>2</sub>O  
187 that contained 0.25 mM 3-(trimethylsilyl) propionic-(2,2,3,3-d<sub>4</sub>) acid sodium salt (TSP), as a  
188 chemical shift reference at 0 ppm.

189 All <sup>1</sup>H NMR spectra were obtained on a Bruker DRX-600-Avance NMR spectrometer  
190 (Bruker) equipped with the AXIOM metabolomics platform (MetaToul). The instrument was

191 operated at 600:13 MHz for  $^1\text{H}$  resonance frequency. It included an inverse detection 5-mm  
192  $^1\text{H}$ - $^{13}\text{C}$ - $^{15}\text{N}$  cryoprobe attached to a cryoplatfrom (the preamplifier cooling unit).

193  $^1\text{H}$  NMR spectra were acquired at 300 K with a standard, one-dimensional noesypr1D  
194 pulse sequence with water presaturation and a total spin-echo delay (2 ns) of 100 ms. Data were  
195 analyzed by applying an exponential window function with a 0.3-Hz line broadening, prior to  
196 Fourier transformation. The resulting spectra were phased, baseline-corrected, and calibrated  
197 to TSP (0:00 ppm) manually with Mnova NMR (version 9.0; Mestrelab Research S.L.). The  
198 spectra were subsequently imported into MatLab (R2014a; MathWorks, Inc.). All data were  
199 analyzed with the use of full-resolution spectra. The region containing the water resonance  
200 (4:6– 5:2 ppm) was removed, and the spectra were normalized to the probabilistic quotient  
201 (Dieterle et al. 2006) and aligned with a previously published function (Veselkov et al. 2009).

202 Data were mean-centered and scaled with unit variance scaling, prior to performing  
203 orthogonal projection on latent structure-discriminant analysis (O-PLS-DA). The O-PLS  
204 derived model was evaluated for accuracy of prediction (Q<sup>2</sup>Y value) with 10-fold cross-  
205 validation. The parameters of the final models are indicated in the figures. Metabolite  
206 identifications and discriminations between the groups were performed by calculating the O-  
207 PLS-DA correlation coefficients ( $r^2$ ) for each variable, and then, back-scaling into a spectral  
208 domain to preserve the shapes of the NMR spectra and the signs of the coefficients (Cloarec et  
209 al. 2005). The weights of the variables were color-coded, according to the square of the O-PLS-  
210 DA correlation coefficients.

211 Correlation coefficients extracted from significant models were filtered, and only  
212 significant correlations above the threshold defined by Pearson's critical correlation coefficient  
213 ( $p < 0.05$ ;  $r^2 > 0.55$ ; for  $n = 12$  per group) were considered significant. For illustration purposes,  
214 the areas under the curves of several signals of interest were integrated, and significance was  
215 tested with a univariate test.

## 216 **2.7 Histology**

217 Hematoxylin/eosin (H&E) staining was performed on paraformaldehyde-fixed,  
218 paraffin-embedded liver tissue sections (3  $\mu$ m). Sections were visualized with a Leica DFC300  
219 camera. Livers were examined with light microscopy. First, liver sections were screened to  
220 determine all the effects present on each section. The histological features were grouped with  
221 the steatosis score (evaluated according to Contos *et al.*, 2001). Liver sections were evaluated  
222 for steatosis and inflammation. The steatosis score was based on the percentage of hepatocytes  
223 that contained fat, where Grade 0 = no hepatocytes containing fat in any section; grade 1 = 1%  
224 to 25% of hepatocytes; grade 2 = 26% to 50% of hepatocytes; grade 3 = 51% to 75% of  
225 hepatocytes; and grade 4 = 76% to 100% of hepatocytes. The inflammation score was the  
226 number of inflammatory foci counted in 10 distinct 200 $\times$  fields for each liver section. Values  
227 represented the mean of 10 fields/liver section.

## 228 **2.8 Gene expression studies**

229 Total cellular RNA was extracted with Trizol reagent (Invitrogen). Transcriptome  
230 profiles were performed with the Agilent Whole Mouse Genome microarray (4 $\times$ 44K),  
231 according to manufacturer instructions. Microarray data and all experimental details are  
232 available in the Gene Expression Omnibus Series database (accession number GSE208735;  
233 <https://www.ncbi.nlm.nih.gov/geo/query/acc.cgi?acc=GSE208735>).

234 Total RNA samples (2  $\mu$ g) were reverse-transcribed with the high-capacity cDNA  
235 reverse transcription kit (Applied Biosystems), then analyzed with real-time quantitative  
236 polymerase chain reaction (qPCR). Primers for the Sybr Green assays are presented in  
237 Supplementary Table 1. Amplifications were performed on a Stratagene Mx3005P  
238 thermocycler (Agilent Technology). qPCR data were normalized to the endogenous level of  
239 proteasome 20S subunit beta 6 messenger RNA (mRNA) and analyzed with LinRegPCR  
240 software.

## 241 **2.9 Microbiota composition analysis through 16S rRNA gene sequencing**

242 We performed 16S ribosomal RNA (rRNA) gene amplification and sequencing with  
243 Illumina MiSeq technology, according to the protocol described by the Earth Microbiome  
244 Project, with slight modifications ([www.earthmicrobiome.org/emp-standard-protocols](http://www.earthmicrobiome.org/emp-standard-protocols)).  
245 Briefly, frozen extruded feces samples were mechanically disrupted (bead beating), and DNA  
246 was extracted with a PowerSoil-htp kit (QIAGEN). From each DNA sample, the 16S rRNA  
247 genes from region V3-V4 were PCR-amplified with a composite forward primer and a reverse  
248 primer. The reverse primer contained a unique 12-base barcode, designed with the Golay error-  
249 correcting scheme, which was used to tag PCR products from respective samples. The  
250 composite forward 515F primer sequence was: 5'-  
251 *AATGATACGGCGACCACCGAGATCTACACGCTXXXXXXXXXXXXTATGGTAATTGT*  
252 *GTGYCAGCMGCCGCGGTAA*-3' where the italicized sequence is the 5' Illumina adaptor,  
253 the 12 X sequence is the golay barcode, the bold sequence is the primer pad, the italicized and  
254 bold sequence is the primer linker, and the underlined sequence is the conserved bacterial  
255 primer 515F. The reverse primer 806R used was 5'-  
256 *CAAGCAGAAGACGGCATACTAGATAGTCAGCCAGCCGGACTACNVGGGTWTCTAA*  
257 *T*-3' where the italicized sequence is the 3' reverse complement sequence of Illumina adaptor,  
258 the bold sequence is the primer pad, the italicized and bold sequence is the primer linker and  
259 the underlined sequence is the conserved bacterial primer 806R. PCR reactions consisted of  
260 Hot Master PCR mix (Quantabio, Beverly, MA, USA), 0.2 mM of each primer, 10-100 ng  
261 template, and reaction conditions were 3 min at 95°C, followed by 35 cycles of 45 s at 95°C,  
262 60 s at 50°C and 90 s at 72°C on a Biorad thermocycler. PCRs products were quantified using  
263 Quant-iT PicoGreen dsDNA assay on a BIOTEK Fluorescence Spectrophotometer and a master  
264 DNA pool was generated from the purified products in equimolar ratios. The obtained pool was  
265 purified with Ampure magnetic purification beads (Agencourt, Brea, CA, USA), and visualized

266 by gel electrophoresis and then sequenced using an Illumina MiSeq sequencer (paired-end  
267 reads, 2x250 bp) at the Genom'IC platform from Cochin Institut.

268

## 269 **2.10 16S rRNA gene sequence analysis**

270 16S rRNA sequences were analyzed with QIIME2 – version 2019.3.60 (Bolyen et al.,  
271 2019). Sequences were demultiplexed and quality-filtered with the Dada2 method (Callahan et  
272 al., 2016). We used QIIME2 default parameters to detect and correct Illumina amplicon  
273 sequence data, and a table of Qiime 2 artifacts was generated. Next, a tree was generated with  
274 the align-to-tree-mafft-fasttree command, for analyzing phylogenetic diversity. Then, alpha and  
275 beta diversity analyses were computed with the core-metrics-phylogenetic command. We  
276 constructed principal coordinates analysis (PCoA) plots to assess the variation between  
277 experimental groups (beta diversity). To analyze the taxonomy, we assigned features to  
278 operational taxonomic units, according to a 99% threshold of pairwise identity to the  
279 Greengenes reference database 13\_8. Unprocessed sequencing data are deposited in the  
280 European Nucleotide Archive under accession number PRJEB54776, publicly accessible at  
281 <https://www.ebi.ac.uk/ena/browser/view/PRJEB54776>.

282

## 283 **2.11 Statistical analysis**

284 Data were analyzed with R (<http://www.r-project.org>). Differential effects were  
285 assessed on log<sub>2</sub>-transformed data by performing analyses of variance (ANOVAs), followed  
286 by Student's t-tests with a pooled variance estimate. P-values from t-tests were adjusted with  
287 the Benjamini-Hochberg correction. A p-value <0.01 was considered significant.

288 We performed hierarchical clustering of gene expression data and lipid quantification  
289 data with the R packages, GenepLOTter and Marray (<https://www.bioconductor.org/>). We used

290 Ward's algorithm, modified by Murtagh and Legendre, as the clustering method. Comparisons  
291 were performed with ANOVAs. All data represented on heat maps had p-values <0.05 for one  
292 or more comparisons.

293 Statistical analyses of microbiota data were performed with GraphPad Prism for  
294 Windows (GraphPad Prism 7.03). When one-way or two-way ANOVAs found statistically  
295 significant differences, they were followed by the appropriate posthoc test (Tukey).  
296 Comparisons between two groups were performed with the student's t-test. P-values <0.05 were  
297 considered significant.

298

### 299 **3. Results**

#### 300 **3.1 FB1 exposure attenuates the effect of HFD feeding on body weight and fasting** 301 **glycemia**

302 Eight-week-old C57BL/6J male mice were either fed a low-fat chow diet (10% fat,  
303 CHOW) or a HFD (60% fat) *ad libitum* for 15 weeks. At the beginning of the experiment, the  
304 four groups of mice were homogeneous in terms of weight. The two groups of mice fed the  
305 HFD became overweight within 12 weeks and gained an average of 2g per week per mouse  
306 (Fig. S1A). During the same time period, the two groups of mice fed the CHOW diet only  
307 gained 4 g body weight (bw) per mouse (Fig. 1A). HFD-fed mice gained significantly more  
308 weight, starting from the second week of HFD feeding (Fig. S1B). The difference in body  
309 weight continued until the 12th week, when half the mice in each group were exposed to FB1.  
310 Thus, during the last three weeks, FB1 (10 mg/kg bw/day) was only added to the drinking water  
311 of FB1-exposed groups. From the 12th week to the end of the experiment, FB1 exposure did  
312 not affect the weight of CHOW-fed mice, but it induced significant weight loss in HFD-fed  
313 mice (around 5 g per mouse; Figure 1A). An evaluation of the food consumed during the last 3  
314 weeks revealed a significant reduction in daily quantity of food intake associated with the HFD-

315 diet in mice exposed to FB1 (but not in the energy intake that significantly increase – Fig. S1C),  
316 but FB1 did not significantly influence feeding in CHOW-fed mice (Fig. 1B). In the same  
317 period, water consumption increased in mice exposed to FB1 under the CHOW diet, but not in  
318 mice under the HFD (Fig. 1C). We checked water consumption to monitor the FB1-exposure  
319 level during the experiment and found that exposure to FB1 was similar in both dietary groups  
320 (HFD =  $10.5 \pm 0.2$  mg/kg bw/day vs. CHOW =  $10.7 \pm 0.6$  mg/kg bw/day; Fig. 1D).

321 In response to HFD feeding, we observed significant increases in the levels of fasting  
322 blood glucose (Fig. 1E) and blood insulin (Fig. 1F). However, FB1-exposed mice under the  
323 HFD had significantly lower fasting blood glucose levels than the unexposed HFD-fed mice.

324 Finally, we evaluated plasma FB1 levels to determine whether the HFD modulated the  
325 oral bioavailability of FB1 (Fig. 1G). A comparison between FB1-exposed mice fed CHOW or  
326 HFD showed that the HFD increased the FB1 plasma level by 4.5-fold, from  $1.54 \pm 0.2$  ng/ml  
327 to  $6.92 \pm 0.8$  ng/ml. Taken together, these results demonstrate that HFD-induced obesity and  
328 hyperglycemia blood level were partially reversed by FB1 exposure. This FB1 effect observed  
329 in obese mice was correlated with an increase plasma concentration of FB1.

### 330 **3.2 HFD feeding and FB1 exposure influence gut microbiota composition**

331 Next, we investigated whether FB1 effects on obesity and glycemia were related to  
332 altered gut homeostasis. We analyzed the effects of both HFD feeding and FB1 exposure on  
333 cecal microbial structure through V3-V4 hypervariable regions in 16S rRNA high throughput  
334 sequencing. Under a CHOW diet, FB1 exposure did not impacted intestinal microbiota alpha  
335 diversity while, as expected, HFD was associated with significant decrease in alpha diversity,  
336 as assessed by both the Shannon and Simpson index (Fig. 2A). Importantly, in HFD-fed mice  
337 exposed to FB1, alpha diversity was similar to that observed in CHOW-fed mice, suggesting  
338 an impact of both HFD and FB1 in regulating intestinal microbiota composition. In order to  
339 investigate which phyla were impacted by HFD and/or FB1, we next explored the relative

340 frequencies of taxa at the phylum level (Fig. 2B). HFD feeding significantly decreased the  
341 relative frequency of Firmicutes and Actinobacteria and increased the relative frequency of  
342 Proteobacteria. In CHOW-fed mice, FB1 did not significantly change the Proteobacteria  
343 frequency, but the Actinobacteria and the Firmicutes frequencies were significantly reduced,  
344 while the Verrucomicrobia frequency was significantly increased, compared to the frequencies  
345 observed in unexposed CHOW-fed mice. In HFD-fed mice, FB1 exposure had little or no  
346 significant effects on the relative frequencies of Actinobacteria and Firmicutes. Nevertheless,  
347 these results showed that FB1 did not have either synergistic or cumulative effects. For  
348 Proteobacteria, the HFD combined with FB1 exposure attenuated the increased relative  
349 frequency observed with the HFD alone. However, FB1 induced an increase in the frequency  
350 of the Verrucomicrobia phylum in HFD-fed mice.

351 Beta diversity was next evaluated using the Bray-Curtis and unweighted unifracs  
352 dissimilarity indexes (Fig. 2C-E). Both PCoA plots showed that HFD feeding was the main  
353 factor driving differences in gut microbiota composition, with a clear separation along the 1<sup>st</sup>  
354 PCoA axis. The Bray-Curtis PCoA plot illustrates a significant effect of FB1 in both CHOW-  
355 and HFD-fed mice. In the unweighted unifracs PCoA, the FB1-CHOW and the CTRL-CHOW  
356 groups were merged, while significant distinct clustering was observed between FB1-HFD and  
357 CTRL-HFD groups (Fig 2E), suggesting a stronger impact of FB1 in HFD-fed mice on low  
358 abundant ASVs. These findings were confirmed by investigation of the distances separating  
359 individual animals within or between groups (Figure 2C). The bray-curtis distance between the  
360 FB1- and CTRL-treated animals fed a CHOW diet was significantly lower than the distance  
361 between the FB1- and CTRL-treated animals fed a HFD diet, while the opposite pattern was  
362 observed using the unweighted unifracs distance (Fig 2D). This indicates that FB1 effects on the  
363 gut microbiota seem to depend on the animal diet, with FB1 impacting mostly low abundant  
364 bacteria upon HFD feeding.



365 Finally, we conducted association analysis between microbial ASVs and experimental  
366 groups using general linear models (Fig 2F-H). Upon CHOW diet, we found 14 ASVs  
367 significantly more abundant, and 16 ASVs significantly less abundant in FB1-treated vs. CTRL  
368 mice; while upon HFD diet, 29 ASVs were significantly more abundant, and 16 ASVs  
369 significantly less abundant, in FB1-treated vs. CTRL mice. Surprisingly, only 2 ASVs were  
370 significantly impacted by FB1 under both dietary regimen (Fig 2F). Adjusted q-value-based  
371 hierarchical clustering of these significant OTUs further illustrates this diet-dependent impact  
372 of FB1 on gut microbiota, with the ASVs clearly clustering into 5 different clusters (Fig 2G).  
373 Among those, ASVs belonging to clusters 1 and 5, illustrate a clear FB1\*diet interaction, with  
374 FB1 impacting ASVs relative abundance only in HFD-fed mice (Fig 2H).

375 Taken together, these results provide evidence that the ecological balance of gut  
376 microbiota was significantly modified by both the HFD and FB1 exposure. Moreover, we  
377 observed an interaction between HFD and FB1 on the intestinal microbiota composition.

### 378 **3.3 FB1 reverses HFD-induced hepatic steatosis, but promotes liver inflammation**

379 Next, we performed histological analyses of the liver to assess the effects of HFD  
380 feeding and FB1 exposure on liver physiology and homeostasis (Fig. 3A). Histological H&E  
381 staining showed that HFD feeding induced steatosis. In CHOW-fed mice, FB1 exposure did  
382 not induce any detectable morphological differences from unexposed samples. However, in the  
383 HFD group, FB1 exposure induced a marked reduction in steatosis compared to the unexposed  
384 group. These results were associated with a significant decrease in liver weight (Fig. 3B),  
385 steatosis scores (Fig. 3C), hepatic triglycerides (Fig. 3D) and in some mRNA relative genes  
386 expression corresponding to lipogenesis (Fig. S2A). Additionally, both hepatic free-cholesterol  
387 and esterified cholesterol were increased in the HFD group compared to the CHOW group, but  
388 FB1 exposure did not significantly affect these HFD effects (Fig. 3E and 3F).

389 Furthermore, H&E staining revealed that liver sections from mice fed the HFD and  
390 exposed to FB1 had significantly more inflammatory foci than any of the other mouse groups  
391 (Fig. 3A). Liver inflammation was confirmed by the inflammatory score (Fig. 3G), and by the  
392 significant increases in the relative hepatic expression of *Tnf* and *Ccl2* mRNA (Fig. 3H,I).  
393 Although both of these genes were significantly upregulated in response to the HFD, only the  
394 relative expression *Tnf* mRNA was significantly increased with FB1 exposure, compared to  
395 HFD feeding alone (Fig. S2B,C).

396 Liver damage was confirmed by analyzing plasma levels of ALT (Fig. 3J) and AST (Fig.  
397 3K). Both these enzymes were elevated in HFD-fed mice compared to CHOW-fed mice. In  
398 HFD-fed mice, FB1 exposure caused further elevations of ALT and AST. In addition, the plasma  
399 ALP and total bilirubin levels were significantly increased when HFD-fed mice were exposed  
400 to FB1 (Fig. 3L,M).

401 Taken together, these data suggest that the HFD combined with FB1 reversed HFD-  
402 induced hepatic steatosis, but promoted liver inflammation and hepatocytolysis. The HFD  
403 combined with FB1 perturbed the bile and bilirubin.

#### 404 **3.4 Effect of FB1 on hepatic sphingolipid homeostasis**

405 With FB1 being a known ceramide synthase inhibitor, we next investigated FB1-induced  
406 alterations in hepatic sphingolipid metabolism in both CHOW-fed and HFD-fed mice. We  
407 measured several sphingolipid species in the liver, including sphinganine (Sa), sphingosine  
408 (So), sphingosine-1-phosphate (S1P), ceramides, dihydroceramides, and sphingomyelins (Fig.  
409 4).

410 As expected, under the CHOW diet, FB1 exposure induced significant increases in the  
411 hepatic levels of sphingoid bases and of the Sa/So ratio (3-fold increase). These sphingoids are  
412 well-known biomarkers for FB1 effects (Fig. 4A-C). Moreover, the total hepatic levels of  
413 dihydrosphingomyelins also increased significantly with FB1 exposure under the CHOW diet

414 (Fig. 4H). Surprisingly, under the CHOW diet, the level of FB1 exposure applied did not  
415 significantly affect the hepatic levels of S1P, total ceramides, total dihydroceramides, or total  
416 sphingomyelins (Fig. 4D-G). A closer look at the specific ceramide and sphingomyelin species  
417 (Fig. 4I, 4K) showed that the abundances of some were significantly reduced, including  
418 ceramide(d18:1/16:0), sphingomyelin(d18:1/14:0), sphingomyelin(d18:1/16:0),  
419 sphingomyelin(d18:1/16:1), sphingomyelin(d18:1/20:1), sphingomyelin(d18:1/22:1),  
420 sphingomyelin(d18:1/24:2), and sphingomyelin(d18:1/24:3). Moreover, under the CHOW diet,  
421 FB1 exposure induced significantly higher levels of specific dihydroceramides (Fig. 4J) and  
422 long carbon-chain dihydrosphingomyelins (Fig. 4L).

423 Under HFD feeding, the basal hepatic levels of ceramides, dihydroceramides,  
424 sphingomyelins, and dihydrosphingomyelins significantly increased (Fig. 4E-H). Similarly, the  
425 levels of sphinganine and sphingosine increased, but the Sa/So ratio remained unchanged (Fig.  
426 4A-C). In contrast, the level of S1P significantly decreased with the HFD (Fig. 4D). Analyzing  
427 the specific ceramides, dihydroceramides, sphingomyelins, and dihydrosphingomyelins  
428 species, we found that HFD feeding caused significant elevations in nearly all species (Fig. 4I-  
429 L).

430 When the HFD was combined with FB1 exposure, stronger effects were observed on  
431 sphingolipid metabolism. This combined treatment induced a significant increase in the hepatic  
432 sphinganine levels (Fig. 4A) and a reduction in the hepatic sphingosine levels, to the level  
433 observed in unexposed HFD-fed mice, but not to the level observed in CHOW-fed unexposed  
434 mice (Fig. 4B). These changes in sphingoid base levels resulted in a marked increase in the  
435 Sa/So ratio (20-fold increase), which is characteristic of severe FB1 contamination (Fig. 4C).  
436 Moreover, when the HFD was combined with FB1 exposure, the reduced sphingosine level was  
437 associated with a significant increase in the S1P level, to the level observed in unexposed HFD-  
438 fed mice (Fig. 4D). In addition, the HFD combined with FB1 exposure caused significant

439 reductions in the hepatic levels of ceramide, dihydroceramides, sphingomyelins, and  
440 dihydrosphingomyelins, compared to unexposed HFD-fed mice (Fig. 4E-L). Nevertheless, the  
441 total sphingomyelin level was reduced to a significantly lower level than that observed in  
442 unexposed CHOW-fed mice, the total ceramide level was reduced to the same level as that  
443 observed in unexposed CHOW-fed mice. Finally, in HFD-fed mice exposed to FB1, the  
444 dihydroceramide and dihydrosphingomyelin levels remained significantly higher than the  
445 levels observed in unexposed CHOW-fed mice.

446 Taken together, these results suggest that HFD-induced liver steatosis enhance FB1  
447 effect on sphingolipid metabolism inhibiting more efficiently ceramide synthetase.  
448 Surprisingly, under HFD-induced obesity FB1 seems to enhance sphingosine-kinase activity  
449 and prevent glycosphingolipid recycling (Fig. S3).

### 450 **3.5 Effect of FB1 on the hepatic metabolome**

451 These severe metabolic effects on sphingolipids and the previous reports (Régnier *et al.*,  
452 2017 ; Régnier *et al.*, 2019b) that indicated that an HFD combined with FB1 exposure had an  
453 impact on lipid metabolism encouraged us to explore the global metabolomic profile of the liver  
454 with an untargeted approach.

455 To investigate the effect of FB1 on hepatic metabolism, we performed <sup>1</sup>H-NMR-based  
456 metabolic profiling on liver tissues. We generated O-PLS-DA plots derived from <sup>1</sup>H-NMR  
457 spectra of aqueous hepatic extracts and compared the effects of FB1 exposure on the liver  
458 metabolic profile under either CHOW or HFD feeding. No significant effects of FB1 exposure  
459 on the profiles of CHOW-fed mice were observed (Fig. 5A). However, FB1 exposure left a  
460 clear, significant metabolic fingerprint in HFD-fed mice (Fig. 5B). The coefficient plot derived  
461 from the O-PLS-DA model for HFD-fed mice highlighted differences in the levels of particular  
462 metabolites associated with FB1-exposure (Fig. 5C). For example, FB1 exposure specifically  
463 impacted the <sup>1</sup>H-NMR chemical shift signals of bile acids, glutamate, succinate, aspartate,

464 dimethylamine, taurine, choline, glycerophosphocholine (GPC), fumarate, tyrosine, and  
465 uridine.

466 The areas under the curves of the <sup>1</sup>H-NMR spectra were integrated for metabolites that  
467 were significantly correlated with the predictive component ( $R^2 > 0.5$ ). Univariate statistics (1-  
468 way ANOVA + Sidak's post-tests) confirmed significant increases in the levels of metabolites  
469 involved in choline metabolism (choline and glycerophosphocholine); the tricarboxylic acid  
470 cycle (fumarate, succinate, aspartate, and glutamate); biliary acid metabolism (mixed bile acids  
471 and taurine); intestinal microbiota dysbiosis (dimethylamine and tyrosine), and uridine  
472 metabolism (Fig. 5D-N). These metabolic profile analyses confirmed that obesity induced by  
473 HFD feeding significantly influenced the effect of FB1 exposure on liver metabolism *in vivo*.

### 474 **3.6 Effect of FB1 exposure on liver gene expression**

475 We next performed an unbiased microarray analysis of liver gene expression to identify  
476 biological processes that were sensitive to FB1 exposure under both CHOW and HFD feeding.  
477 A principal component analysis (PCA) of the transcriptome showed a clear separation between  
478 CHOW-fed and HFD-fed groups (Fig. 6A). The separation observed along the second axis  
479 accounted for 13.6% of the variance. Upon CHOW-fed, the unexposed and FB1 exposed groups  
480 overlapped. In contrast, the unexposed and FB1 exposed HFD-fed groups were clearly  
481 separated. The separation along the first axis accounted for 56.3% of the variance.

482 Volcano plots of the FB1 effect upon CHOW-fed or HFD-fed mice confirmed the  
483 stronger genomic response to FB1 exposure with HFD feeding (Fig. 6B). Indeed, only 77 genes  
484 showed significantly modulated expression with FB1 exposure under the CHOW diet. In  
485 contrast, with the HFD, 9,214 hepatic genes were differentially expressed in response to FB1  
486 exposure (Fig. 6C).

487 We then performed hierarchical clustering to analyze the differentially expressed genes  
488 (those with adjusted p-values < 0.05), which corresponded to 11,920 probes (Fig. 6D). Along the

489 horizontal axis, the blind clustering of profiles did not discriminate between FB1 exposed and  
490 unexposed mice under the CHOW diet. Conversely, HFD feeding induced marked clustering  
491 that discriminated clearly between unexposed mice and FB1 exposed mice. An analysis of the  
492 gene clustering revealed 6 major genetic groups along the vertical axis of the heatmap (Fig.  
493 6D). Of these, four clusters were related to genes with similar expression levels in FB1-exposed  
494 mice under the CHOW diet but differentially expressed genes in FB1-exposed mice under HFD  
495 diet.

496 Expression of genes from clusters 1 and 2 was reduced upon FB1 exposure in HFD-fed  
497 mice. These genes were related to energy metabolism. In the first cluster, 668 genes showed an  
498 important increase in mRNA expression under the HFD compared to the CHOW diet. However,  
499 when the HFD group was exposed to FB1, mRNA expression was similar to the levels observed  
500 under the CHOW diet, with or without exposure to FB1. Moreover, the gene ontology  
501 enrichment analysis of this set of genes (Fig. 6E) revealed that the biological processes most  
502 significantly associated with this cluster were: fatty acid beta-oxidation, very long-chain fatty  
503 acid metabolism, and the tricarboxylic acid cycle. Furthermore, characterization of the most  
504 significantly affected genes in cluster 1 (Fig. 6E) showed that, under HFD feeding, FB1  
505 exposure essentially limited increases in the expression of genes involved in triglyceride  
506 storage, such as *Cidea*, *Fitm1*, *Plin4*, *Vldlr*, and *Elovl5*. In contrast, the 693 genes in cluster 2  
507 showed an important reduction in mRNA expression under HFD feeding with FB1 exposure,  
508 compared to the CHOW-fed, unexposed group. Moreover, under HFD-feeding alone, mRNA  
509 expression was similar to the levels observed under the CHOW diet, with or without FB1  
510 exposure. Similar to cluster 1, the gene ontology enrichment analysis of this set of genes (Fig.  
511 6D) revealed that the biological processes most significantly associated with cluster 2 were:  
512 triglyceride metabolism, the tricarboxylic acid cycle, very long-chain fatty acid metabolism,  
513 carbohydrate catabolism, and steroid biosynthesis. Furthermore, characterization of the most

514 significantly affected genes in cluster 2 (Fig. 6E) showed that, under HFD feeding, FB1  
515 exposure reduced expression of genes involved in fatty acid metabolism, such as: *Elovl3*  
516 (involved in very long-chain fatty acid elongation from C18:0 to provide precursors for  
517 sphingolipid synthesis); *Acacb* and *Pdk1* (involved in fatty acid uptake and oxidation in  
518 mitochondria); and *Thrsp* (involved in lipid storage).

519 Clusters 4 and 5 included genes involved in cell cycle metabolism and organization.  
520 Indeed, the expression levels of the 1,782 genes in cluster 4 were slightly decreased under the  
521 HFD, compared to the CHOW diet. However, a moderate increase in mRNA expression was  
522 observed with the HFD and FB1 exposure, compared to the CHOW diet with FB1 exposure.  
523 Moreover, the gene ontology enrichment analysis (Fig. 6D) revealed that the biological  
524 processes most significantly associated with cluster 4 were translation, chromatin organization,  
525 and RNA splicing. Furthermore, characterization of the most significantly affected genes in  
526 cluster 4 (Fig. 6E) showed that, under HFD feeding, FB1 exposure reversed and slightly  
527 increased the expression of genes involved in cell proliferation (*Tgml*, *Eppk1*) and cell junction  
528 organization (*Marveld2*, *Cdh1*). In cluster 5, the expression of 5,189 genes significantly  
529 increased with the HFD and even more upon FB1 exposure, compared to the CHOW groups,  
530 without or with FB1 exposure. This effect indicated synergy between FB1 exposure and the  
531 HFD. The gene ontology enrichment analysis (Fig. 6D) revealed that the biological processes  
532 most significantly associated with cluster 5 were the mitotic cell cycle, extracellular matrix  
533 organization, RNA splicing, DNA repair, immune system processes, chromatin organization,  
534 and cell death. Furthermore, characterization of the most significantly affected genes in cluster  
535 5 (Fig. 6E) showed that, under HFD feeding, FB1 exposure significantly amplified the  
536 expression of genes involved in cell cycle regulation (*Plk1*, *Prc1*, *Ube2c*, *Cdc20*, *Ccnb1*, *Cenpf*,  
537 *Cenpe*) and cytoskeleton organization (*Ckap2*, *Kif20a*, *Nusap1*, *Anln*).

538           Finally, clusters 3 and 6 exhibited significant modulations with diet, independent of FB1  
539 exposure. Indeed, in cluster 3, the expression levels of 889 genes associated with steroid  
540 biosynthesis or triglyceride metabolism decreased significantly under HFD feeding. In contrast,  
541 in cluster 6, the expression levels of 2,699 genes associated with Golgi vesicle transport  
542 increased under the HFD.

543

#### 544 **4. Discussion**

545           Environmental exposure to natural toxicants or chemical residues, alone or in mixtures,  
546 are frequently associated with the risk of chronic metabolic diseases (Grün et al., 2006).  
547 Moreover, the increasing prevalence of obesity (Estes et al., 2018), increases the risks of various  
548 diseases, including liver injuries. Several studies previously reported that toxicants, like  
549 triclosan (Yueh et al., 2020), 2,3,7,8-tetrachlorodibenzo-p-dioxin (Duval et al., 2017),  
550 chlorpyrifos (Wang et al., 2021), or methyl tert-butyl ether (Tang et al., 2019) contributed to  
551 the progression of obesity-associated liver steatosis. Those findings led us to hypothesize that  
552 environmental toxins may differentially impact liver homeostasis, depending on the presence  
553 of obesity. Among the natural food contaminants, some of the most prevalent and harmful  
554 mycotoxins are known to induce liver toxicity, such as aflatoxin B1 (Fan et al., 2021; Hua et  
555 al., 2020; Plaz Torres et al., 2020), T-2 toxin (Janik et al., 2021), deoxynivalenol (Hasuda et al.  
556 2022), ochratoxin A (Tao et al., 2018), zearalenone (Wang et al., 2019), and FB1 (Wangia-  
557 Dixon et al., 2021).

558           It is well-established that FB1 affects the gut-liver axis and liver metabolism (Terciolo  
559 et al., 2019; Régnier et al., 2017). Therefore, we tested the toxic effects of FB1 exposure in  
560 mice with diet-induced obesity. First, as expected, we showed that HFD feeding induced  
561 obesity, glucose intolerance, and hepatic steatosis (Régnier et al., 2020; Tamura et al., 2005).  
562 Second, we confirmed the known effect of FB1 exposure on sphingolipid homeostasis, which



563 resulted in an increase in the Sa/So ratio (Régnier et al., 2019; Loiseau et al., 2015). Then, we  
564 observed that HFD-induced obesity followed by 4 weeks of co-exposure to an HFD and FB1  
565 resulted in gut dysbiosis, increased plasma FB1 levels, and reductions in body weight, liver  
566 weight, fasting blood glucose, and triglyceride levels. However, several plasma markers of liver  
567 injury (ALT, AST, ALP, and bilirubin) were significantly increased, which indicated severe  
568 hepatitis. Finally, unbiased analyses of the liver metabolome and transcriptome produced  
569 results consistent with the notion that FB1 exposure had a potent effect on liver metabolism,  
570 which is additive to the effects of diet-induced obesity.

571 Several lines of evidence have suggested that environmental toxicants may influence  
572 obesity and NAFLD (Rajak et al., 2021). However, most preclinical studies supporting this  
573 hypothesis were co-exposure studies. In contrast, the present study took an original approach  
574 by exposing mice to FB1 after they became obese and hyperglycemic on the HFD. We  
575 monitored body weight and water intake to ensure that chow-fed and HFD-fed mice were  
576 exposed to a similar dose of FB1 relative to body weight. Thus, with similar FB1 dosing, normal  
577 and obese mice showed different systemic and hepatic responses to FB1. However, the plasma  
578 FB1 levels were different in CHOW and HFD groups. This result might be due to either  
579 increased FB1 absorption or reduced FB1 clearance in the HFD-fed mice.

580 This study had some limitations. First, our study design did not allow us to determine  
581 the mechanism by which HFD exposure induces the increase in circulating plasma level of FB1.  
582 The HFD might have changed the gut physiology, altered the microbiota composition and/or  
583 activity (Rohr et al., 2020; Mouries et al., 2019), or suppressed FB1 detoxication; indeed, both  
584 obesity and hepatic steatosis are known to hamper detoxification processes in the gut and liver  
585 (Cobbina *et al.*, 2017; Sharpton *et al.*, 2019). Another limitation of the study was that we  
586 administered a high dose of FB1, which was hundred times above the BMDL<sub>10</sub> of 0.1 mg/kg  
587 bw per day calculated by the CONTAM Panel from EFSA and derived for induction of

588 megalocytic hepatocytes in mice (Bondy *et al.*, 2012; Knutsen *et al.*, 2018a). Thus, one might  
589 question the potential relevance of the findings to animal and human populations (Terciolo *et*  
590 *al.*, 2019). However, rodents are known to be particularly resistant to FB1 toxicity; indeed, very  
591 few biological markers have been modulated in rodents under a regular CHOW diet.  
592 Nevertheless, the additive effects of HFD feeding and FB1 exposure observed in this study  
593 provided further evidence that obesity could weaken the host's ability to cope with food toxins,  
594 and revealed novel insights on the hepatic toxicity of FB1.

595         In obesity, the liver is exposed to increase in both endotoxin levels and metabolic stress.  
596 Both these factors promote NAFLD, which ranges in severity, from steatosis to steatohepatitis,  
597 cirrhosis, and cancer (Ferro *et al.*, 2020; Todoric *et al.*, 2020; Loo *et al.*, 2017; Kübeck *et al.*,  
598 2016). Based on our histological analyses and our targeted assays on liver composition and  
599 function, we concluded that FB1 reduced the steatosis and neutral lipid deposition induced by  
600 HFD feeding. These effects were associated with reductions in body weight and hyperglycemia,  
601 which suggested that FB1 could reduce obesity and diabetes, which in turn, might have  
602 contributed to reducing hepatic lipid accumulation (Meikle *et al.*, 2017; Holland *et al.*, 2008).  
603 Our monitoring of food intake showed that mice did not significantly reduce food intake during  
604 FB1 exposure. This result suggested that FB1 affected calorie absorption and/or expenditure.  
605 However, this hypothesis warrants future study, because it is beyond the direct effects of FB1  
606 on hepatic homeostasis. Although FB1 exposure reduced steatosis in HFD-fed mice, it also  
607 significantly induced liver inflammation, damage, and dysfunction. Indeed, FB1-induced  
608 hepatitis was much more severe in HFD-fed mice than in CHOW-fed mice, and it was  
609 associated with a massive shift in liver metabolism and gene expression.

610         It remains unclear whether all of these HFD-exacerbated signs of FB1 toxicity were  
611 related to FB1 inhibition of sphingolipid synthesis or whether it involved multiple organ cross-  
612 talk. Sphingolipids, such as ceramides, are bioactive lipids that drive the progression of steatosis

613 (Hannun et al., 2018; Choi et al., 2015; Xia et al., 2015). Indeed, several studies have identified  
614 correlations between ceramides and different measures of NAFLD in humans. Additionally,  
615 various preclinical studies in rodents have demonstrated that ceramides are necessary for  
616 NAFLD development (Poss et al., 2020; Chaurasia et al., 2016; Régnier et al., 2019). Therefore,  
617 the effects of FB1 that we observed on steatosis were consistent with an inhibition of the  
618 steatogenic role of ceramides (Chaurasia et al., 2019; Holland et al., 2008). Furthermore, the  
619 effects of FB1 on liver damage and inflammation were consistent with an inhibition of the well-  
620 known pro-inflammatory and pro-apoptotic effects of sphingolipid species respectively such as  
621 S1P and sphingoid bases (Molino et al., 2017; Riley et al., 2001). Therefore, the pro-  
622 inflammatory effects of FB1 observed in HFD-fed mice might have occurred as an indirect  
623 consequence of altered ceramide homeostasis (Chen et al., 2021). Alternatively, high FB1  
624 exposure may exert toxic effects in hepatocytes that are independent of ceramide metabolism,  
625 but reflect a mechanism yet to be determined.

626

## 627 **5. Conclusion**

628 To our knowledge, the present study was the first to assess the effects of diet-induced  
629 obesity on FB1 toxicity. This work established that, in an obese context, FB1 exposure  
630 exhibited enhanced gut dysbiosis, systemic and hepatotoxic effects. Although FB1 exposure in  
631 diet-induced obese mice led to significant reductions in body weight, glycemia, and hepatic  
632 lipid content, it also led to liver inflammation and increases in various markers of  
633 hepatotoxicity. Therefore, our findings suggested that diet-induced obesity might increase the  
634 sensitivity to environmental toxins.

635

636 **Declaration of Competing Interest**

637           The authors declare no competing financial interests or personal relationships that could  
638 have influenced the study.

639 **Acknowledgements**

640           L.D. PhD was supported by the INRAE Animal Health department. This work was also  
641 supported by grants from the French National Research Agency (ANR) Fumolip (ANR-16-  
642 CE21-0003) and the Hepatomics FEDER program of Région Occitanie. We thank Prof Wentzel  
643 C. Gelderblom for generously providing the FB1 and for his interest and support in our project.  
644 B.C. laboratory is supported by a Starting Grant from the European Research Council (ERC)  
645 under the European Union’s Horizon 2020 research and innovation program (grant agreement  
646 No. ERC-2018-StG- 804135), a Chaire d’Excellence from IdEx Université de Paris - ANR-18-  
647 IDEX-0001, an Innovator Award from the Kenneth Rainin Foundation, an ANR grant  
648 EMULBIONT ANR-21-CE15-0042-01 and the national program “Microbiote” from INSERM.  
649 We thank Anexplo Genotoul MetaToul for their excellent work in plasma biochemistry. Neutral  
650 Lipids MS and NMR experiments were performed with instruments in the Metatoul-AXIOM  
651 platform. Sphingolipid MS analysis were performed with instruments in the RUBAM platform.  
652 The FB1 plasma levels were determined using an UPLC-MS/MS instrument part of the Ghent  
653 University MSsmall expertise centre for advanced mass spectrometry analysis of small organic  
654 molecules. We thank Elodie Rousseau-Bacquié and all members of the EZOP staff for their  
655 assistance in the animal facility. We are very grateful to Talal al Saati for histology analyses  
656 and review, and we thank all members of the US006/CREFRE staff at the histology facility and  
657 the Genom’IC platforms (INSERM U1016, Paris, France) for their expertise.

658

659 **References**

660 (Ec) No 1126/2007 Commission Regulation, 2007. COMMISSION REGULATION (EC) No  
661 1126/2007.

662 (Ec) No 576/2006 Commission Recommendation, 2006. COMMISSION  
663 RECOMMENDATION (EC) No 576/2006.

664 Barbacini, P., Casas, J., Torretta, E., Capitanio, D., Maccallini, G., Hirschler, V., Gelfi, C.,  
665 2019. Regulation of Serum Sphingolipids in Andean Children Born and Living at High  
666 Altitude (3775 m). *Int. J. Mol. Sci.* 20. <https://doi.org/10.3390/IJMS20112835>

667 Bolyen, E., Rideout, J.R., Dillon, M.R., Bokulich, N.A., Abnet, C.C., Al-Ghalith, G.A.,  
668 Alexander, H., Alm, E.J., Arumugam, M., Asnicar, F., Bai, Y., Bisanz, J.E., Bittinger, K.,  
669 Brejnrod, A., Brislawn, C.J., Brown, C.T., Callahan, B.J., Caraballo-Rodríguez, A.M.,  
670 Chase, J., Cope, E.K., Da Silva, R., Diener, C., Dorrestein, P.C., Douglas, G.M., Durall,  
671 D.M., Duvallet, C., Edwardson, C.F., Ernst, M., Estaki, M., Fouquier, J., Gauglitz, J.M.,  
672 Gibbons, S.M., Gibson, D.L., Gonzalez, A., Gorlick, K., Guo, J., Hillmann, B., Holmes,  
673 S., Holste, H., Huttenhower, C., Huttley, G.A., Janssen, S., Jarmusch, A.K., Jiang, L.,  
674 Kaehler, B.D., Kang, K. Bin, Keefe, C.R., Keim, P., Kelley, S.T., Knights, D., Koester,  
675 I., Kosciolk, T., Kreps, J., Langille, M.G.I., Lee, J., Ley, R., Liu, Y.X., Loftfield, E.,  
676 Lozupone, C., Maher, M., Marotz, C., Martin, B.D., McDonald, D., McIver, L.J., Melnik,  
677 A. V., Metcalf, J.L., Morgan, S.C., Morton, J.T., Naimey, A.T., Navas-Molina, J.A.,  
678 Nothias, L.F., Orchanian, S.B., Pearson, T., Peoples, S.L., Petras, D., Preuss, M.L.,  
679 Pruesse, E., Rasmussen, L.B., Rivers, A., Robeson, M.S., Rosenthal, P., Segata, N.,  
680 Shaffer, M., Shiffer, A., Sinha, R., Song, S.J., Spear, J.R., Swafford, A.D., Thompson,  
681 L.R., Torres, P.J., Trinh, P., Tripathi, A., Turnbaugh, P.J., Ul-Hasan, S., van der Hooft,  
682 J.J.J., Vargas, F., Vázquez-Baeza, Y., Vogtmann, E., von Hippel, M., Walters, W., Wan,  
683 Y., Wang, M., Warren, J., Weber, K.C., Williamson, C.H.D., Willis, A.D., Xu, Z.Z.,

- 684 Zaneveld, J.R., Zhang, Y., Zhu, Q., Knight, R., Caporaso, J.G., 2019. Reproducible,  
685 interactive, scalable and extensible microbiome data science using QIIME 2. *Nat.*  
686 *Biotechnol.* 2019 378 37, 852–857. <https://doi.org/10.1038/s41587-019-0209-9>
- 687 Bondy, G., Mehta, R., Caldwell, D., Coady, L., Armstrong, C., Savard, M., Miller, J.D.,  
688 Chomyshyn, E., Bronson, R., Zitomer, N., Riley, R.T., 2012. Effects of long term  
689 exposure to the mycotoxin fumonisin B1 in p53 heterozygous and p53 homozygous  
690 transgenic mice. *Food Chem. Toxicol.* 50, 3604–13.  
691 <https://doi.org/10.1016/j.fct.2012.07.024>
- 692 Bouhet, S., Le Dorze, E., Peres, S., Fairbrother, J.M., Oswald, I.P., 2006. Mycotoxin fumonisin  
693 B1 selectively down-regulates the basal IL-8 expression in pig intestine: in vivo and in  
694 vitro studies. *Food Chem. Toxicol.* 44, 1768–1773.  
695 <https://doi.org/10.1016/J.FCT.2006.05.018>
- 696 Callahan, B.J., McMurdie, P.J., Rosen, M.J., Han, A.W., Johnson, A.J.A., Holmes, S.P., 2016.  
697 DADA2: High-resolution sample inference from Illumina amplicon data. *Nat. Methods*  
698 2016 137 13, 581–583. <https://doi.org/10.1038/nmeth.3869>
- 699 Cano, P.M., Puel, O., Oswald, I.P., 2016. Mycotoxins: Fungal Secondary Metabolites with  
700 Toxic Properties. *Prog. Mycol. Res.* IV, 318–337.
- 701 Chassaing, B., Koren, O., Goodrich, J.K., Poole, A.C., Srinivasan, S., Ley, R.E., Gewirtz, A.T.,  
702 2015. Dietary emulsifiers impact the mouse gut microbiota promoting colitis and  
703 metabolic syndrome. *Nat.* 2015 5197541 519, 92–96.  
704 <https://doi.org/10.1038/NATURE14232>
- 705 Chaurasia, B., Kaddai, V.A., Lancaster, G.I., Henstridge, D.C., Sriram, S., Galam, D.L.A.,  
706 Gopalan, V., Prakash, K.N.B., Velan, S.S., Bulchand, S., Tsong, T.J., Wang, M.,  
707 Siddique, M.M., Yuguang, G., Sigmundsson, K., Mellet, N.A., Weir, J.M., Meikle, P.J.,  
708 Bin M. Yassin, M.S., Shabbir, A., Shayman, J.A., Hirabayashi, Y., Shiow, S.A.T.E.,

- 709 Sugii, S., Summers, S.A., 2016. Adipocyte Ceramides Regulate Subcutaneous Adipose  
710 Browning, Inflammation, and Metabolism. *Cell Metab.* 24.  
711 <https://doi.org/10.1016/j.cmet.2016.10.002>
- 712 Chaurasia, B., Tippetts, T.S., Monibas, R.M., Liu, J., Li, Y., Wang, Liping, Wilkerson, J.L.,  
713 Rufus Sweeney, C., Pereira, R.F., Sumida, D.H., Alan Maschek, J., Cox, J.E., Kaddai, V.,  
714 Lancaster, G.I., Siddique, M.M., Poss, A., Pearson, M., Satapati, S., Zhou, H., McLaren,  
715 D.G., Previs, S.F., Chen, Y., Qian, Y., Petrov, A., Wu, M., Shen, X., Yao, J., Nunes, C.N.,  
716 Howard, A.D., Wang, Liangsu, Erion, M.D., Rutter, J., Holland, W.L., Kelley, D.E.,  
717 Summers, S.A., 2019. Targeting a ceramide double bond improves insulin resistance and  
718 hepatic steatosis. *Science* 365, 386–392. <https://doi.org/10.1126/SCIENCE.AAV3722>
- 719 Choi, S., Snider, A.J., 2015. Sphingolipids in High Fat Diet and Obesity-Related Diseases.  
720 *Mediators Inflamm.* 2015. <https://doi.org/10.1155/2015/520618>
- 721 Cirulli, E.T., Guo, L., Leon Swisher, C., Shah, N., Huang, L., Napier, L.A., Kirkness, E.F.,  
722 Spector, T.D., Caskey, C.T., Thorens, B., Venter, J.C., Telenti, A., 2019. Profound  
723 Perturbation of the Metabolome in Obesity Is Associated with Health Risk. *Cell Metab.*  
724 29, 488-500.e2. <https://doi.org/10.1016/J.CMET.2018.09.022>
- 725 Cloarec, O., Dumas, M.E., Craig, A., Barton, R.H., Trygg, J., Hudson, J., Blancher, C.,  
726 Gauguier, D., Lindon, J.C., Holmes, E., Nicholson, J., 2005. Statistical total correlation  
727 spectroscopy: an exploratory approach for latent biomarker identification from metabolic  
728 <sup>1</sup>H NMR data sets. *Anal. Chem.* 77, 1282–1289. <https://doi.org/10.1021/AC048630X>
- 729 Cobbina, E., Akhlaghi, F., 2017. Non-alcoholic fatty liver disease (NAFLD) - pathogenesis,  
730 classification, and effect on drug metabolizing enzymes and transporters. *Drug Metab.*  
731 *Rev.* 49, 197–211. <https://doi.org/10.1080/03602532.2017.1293683>
- 732 Contos, M.J., Cales, W., Sterling, R.K., Luketic, V.A., Shiffman, M.L., Mills, A.S., Fisher,  
733 R.A., Ham, J., Sanyal, A.J., 2001. Development of nonalcoholic fatty liver disease after

- 734 orthotopic liver transplantation for cryptogenic cirrhosis. *Liver Transplant.* 7, 363–373.  
735 <https://doi.org/10.1053/jlts.2001.23011>
- 736 De Baere, S., Croubels, S., Novak, B., Bichl, G., Antonissen, G., 2018. Development and  
737 Validation of a UPLC-MS/MS and UPLC-HR-MS Method for the Determination of  
738 Fumonisin B1 and Its Hydrolysed Metabolites and Fumonisin B2 in Broiler Chicken  
739 Plasma. *Toxins (Basel)*. 10. <https://doi.org/10.3390/TOXINS10020062>
- 740 Devriendt, B., Gallois, M., Verdonck, F., Wache, Y., Bimczok, D., Oswald, I.P., Goddeeris,  
741 B.M., Cox, E., 2009. The food contaminant fumonisin B(1) reduces the maturation of  
742 porcine CD11R1(+) intestinal antigen presenting cells and antigen-specific immune  
743 responses, leading to a prolonged intestinal ETEC infection. *Vet. Res.* 40, 40.  
744 <https://doi.org/10.1051/vetres/2009023>
- 745 Dieterle, F., Ross, A., Schlotterbeck, G., Senn, H., 2006. Probabilistic quotient normalization  
746 as robust method to account for dilution of complex biological mixtures. Application in  
747 1H NMR metabonomics. *Anal. Chem.* 78, 4281–4290.  
748 <https://doi.org/10.1021/AC051632C>
- 749 Duval, C., Teixeira-Clerc, F., Leblanc, A.F., Touch, S., Emond, C., Guerre-Millo, M.,  
750 Lotersztajn, S., Barouki, R., Aggerbeck, M., Coumoul, X., 2017. Chronic exposure to low  
751 doses of dioxin promotes liver Fibrosis development in the C57BL/6J diet-induced  
752 obesity mouse model. *Environ. Health Perspect.* 125, 428–436.  
753 <https://doi.org/10.1289/EHP316>
- 754 Estes, C., Razavi, H., Loomba, R., Younossi, Z., Sanyal, A.J., 2018. Modeling the epidemic of  
755 nonalcoholic fatty liver disease demonstrates an exponential increase in burden of  
756 disease. *Hepatology* 67, 123–133. <https://doi.org/10.1002/hep.29466>



- 757 Fan, T., Xie, Y., Ma, W., 2021. Research progress on the protection and detoxification of  
758 phytochemicals against aflatoxin B<sub>1</sub>-Induced liver toxicity. *Toxicol* 195, 58–68.  
759 <https://doi.org/10.1016/J.TOXICON.2021.03.007>
- 760 Ferro, D., Baratta, F., Pastori, D., Cocomello, N., Colantoni, A., Angelico, F., Del Ben, M.,  
761 2020. New Insights into the Pathogenesis of Non-Alcoholic Fatty Liver Disease: Gut-  
762 Derived Lipopolysaccharides and Oxidative Stress. *Nutrients* 12, 1–14.  
763 <https://doi.org/10.3390/NU12092762>
- 764 Grenier, B., Bracarense, A.P., Schwartz, H.E., Trumel, C., Cossalter, A.M., Schatzmayr, G.,  
765 Kolf-Clauw, M., Moll, W.D., Oswald, I.P., 2012. The low intestinal and hepatic toxicity  
766 of hydrolyzed fumonisin B<sub>1</sub> correlates with its inability to alter the metabolism of  
767 sphingolipids. *Biochem Pharmacol* 83, 1465–1473.  
768 <https://doi.org/10.1016/j.bcp.2012.02.007>
- 769 Grün, F., Blumberg, B., 2006. Environmental Obesogens: Organotins and Endocrine Disruption  
770 via Nuclear Receptor Signaling. *Endocrinology* 147, s50–s55.  
771 <https://doi.org/10.1210/EN.2005-1129>
- 772 Halloy, D.J., Gustin, P.G., Bouhet, S., Oswald, I.P., 2005. Oral exposure to culture material  
773 extract containing fumonisins predisposes swine to the development of pneumonitis  
774 caused by *Pasteurella multocida*. *Toxicology* 213, 34–44.  
775 <https://doi.org/10.1016/J.TOX.2005.05.012>
- 776 Hannun, Y.A., Obeid, L.M., 2018. Sphingolipids and their metabolism in physiology and  
777 disease. *Nat. Rev. Mol. Cell Biol.* 19, 175–191. <https://doi.org/10.1038/NRM.2017.107>
- 778 Holland, W.L., Summers, S.A., 2008. Sphingolipids, Insulin Resistance, and Metabolic  
779 Disease: New Insights from in Vivo Manipulation of Sphingolipid Metabolism. *Endocr.*  
780 *Rev.* 29, 381–402. <https://doi.org/10.1210/er.2007-0025>

781 Hua, Z., Liu, R., Chen, Y., Liu, G., Li, C., Song, Y., Cao, Z., Li, Wen, Li, Weifeng, Lu, C., Liu,  
782 Y., 2021. Contamination of Aflatoxins Induces Severe Hepatotoxicity Through Multiple  
783 Mechanisms. *Front. Pharmacol.* 11. <https://doi.org/10.3389/FPHAR.2020.605823>

784 Janik, E., Niemcewicz, M., Podogrocki, M., Ceremuga, M., Stela, M., Bijak, M., 2021. T-2  
785 Toxin—The Most Toxic Trichothecene Mycotoxin: Metabolism, Toxicity, and  
786 Decontamination Strategies. *Mol.* 2021, Vol. 26, Page 6868 26, 6868.  
787 <https://doi.org/10.3390/MOLECULES26226868>

788 Knutsen, H.K., Barregård, L., Bignami, M., Brüschweiler, B., Ceccatelli, S., Cottrill, B.,  
789 Dinovi, M., Edler, L., Grasl-Kraupp, B., Hogstrand, C., Hoogenboom, L. (Ron), Nebbia,  
790 C.S., Petersen, A., Rose, M., Roudot, A., Schwerdtle, T., Vleminckx, C., Vollmer, G.,  
791 Wallace, H., Dall’Asta, C., Gutleb, A.C., Humpf, H., Galli, C., Metzler, M., Oswald, I.P.,  
792 Parent-Massin, D., Binaglia, M., Steinkellner, H., Alexander, J., Alexander, J., 2018a.  
793 Appropriateness to set a group health-based guidance value for fumonisins and their  
794 modified forms. *EFSA J.* 16. <https://doi.org/10.2903/j.efsa.2018.5172>

795 Knutsen, H.K., Alexander, J., Barregård, L., Bignami, M., Brüschweiler, B., Ceccatelli, S.,  
796 Cottrill, B., Dinovi, M., Edler, L., Grasl-Kraupp, B., Hogstrand, C., Hoogenboom, L.  
797 (Ron), Nebbia, C.S., Petersen, A., Rose, M., Roudot, A.C., Schwerdtle, T., Vleminckx,  
798 C., Vollmer, G., Wallace, H., Dall’Asta, C., Eriksen, G.S., Taranu, I., Altieri, A., Roldán-  
799 Torres, R., Oswald, I.P., 2018b. Risks for animal health related to the presence of  
800 fumonisins, their modified forms and hidden forms in feed. *EFSA J.* 16.  
801 <https://doi.org/10.2903/j.efsa.2018.5242>

802 Kübeck, R., Bonet-Ripoll, C., Hoffmann, C., Walker, A., Müller, V.M., Schüppel, V.L.,  
803 Lagkouvardos, I., Scholz, B., Engel, K.H., Daniel, H., Schmitt-Kopplin, P., Haller, D.,  
804 Clavel, T., Klingenspor, M., 2016. Dietary fat and gut microbiota interactions determine

805 diet-induced obesity in mice. *Mol. Metab.* 5, 1162–1174.  
806 <https://doi.org/10.1016/J.MOLMET.2016.10.001>

807 Loiseau, N., Debrauwer, L., Sambou, T., Bouhet, S., Miller, J.D., Martin, P.G., Viadère, J.L.,  
808 Pinton, P., Puel, O., Pineau, T., Tulliez, J., Galtier, P., Oswald, I.P., 2007. Fumonisin B1  
809 exposure and its selective effect on porcine jejunal segment: sphingolipids, glycolipids  
810 and trans-epithelial passage disturbance. *Biochem Pharmacol* 74, 144–152.  
811 <https://doi.org/10.1016/j.bcp.2007.03.031>

812 Loiseau, N., Polizzi, A., Dupuy, A., Therville, N., Rakotonirainy, M., Loy, J., Viadere, J.L.,  
813 Cossalter, A.M., Bailly, J.D., Puel, O., Kolf-Clauw, M., Bertrand-Michel, J., Levade, T.,  
814 Guillou, H., Oswald, I.P., 2015. New insights into the organ-specific adverse effects of  
815 fumonisin B1: comparison between lung and liver. *Arch. Toxicol.* 89, 1619–1629.  
816 <https://doi.org/10.1007/s00204-014-1323-6>

817 Loo, T.M., Kamachi, F., Watanabe, Y., Yoshimoto, S., Kanda, H., Arai, Y., Nakajima-Takagi,  
818 Y., Iwama, A., Koga, T., Sugimoto, Y., Ozawa, T., Nakamura, M., Kumagai, M.,  
819 Watashi, K., Taketo, M.M., Aoki, T., Narumiya, S., Oshima, M., Arita, M., Hara, E.,  
820 Ohtani, N., 2017. Gut Microbiota Promotes Obesity-Associated Liver Cancer through  
821 PGE 2-Mediated Suppression of Antitumor Immunity. *Cancer Discov.* 7, 522–538.  
822 <https://doi.org/10.1158/2159-8290.CD-16-0932>

823 Hasuda, A.L., Person, E., Khoshal, A.K., Bruel, S., Puel, S., Oswald, I.P., Bracarense,  
824 A.P.F.R.L., Pinton, P., 2022. Deoxynivalenol induces apoptosis and inflammation in the  
825 liver: Analysis using precision-cut liver slices. *Food Chem. Toxicol.* 163, 112930.  
826 <https://doi.org/10.1016/J.FCT.2022.112930>

827 Meikle, P.J., Summers, S.A., 2017. Sphingolipids and phospholipids in insulin resistance and  
828 related metabolic disorders. *Nat. Rev. Endocrinol.*  
829 <https://doi.org/10.1038/nrendo.2016.169>

- 830 Molino, S., Tate, E., McKillop, W., Medin, J.A., 2017. Sphingolipid pathway enzymes  
831 modulate cell fate and immune responses. *Immunotherapy* 9, 1185–1198.  
832 <https://doi.org/10.2217/IMT-2017-0089>
- 833 Mouries, J., Brescia, P., Silvestri, A., Spadoni, I., Sorribas, M., Wiest, R., Mileti, E., Galbiati,  
834 M., Invernizzi, P., Adorini, L., Penna, G., Rescigno, M., 2019. Microbiota-driven gut  
835 vascular barrier disruption is a prerequisite for non-alcoholic steatohepatitis development.  
836 *J. Hepatol.* 71, 1216–1228. <https://doi.org/10.1016/J.JHEP.2019.08.005>
- 837 Pillon, N.J., Loos, R.J.F., Marshall, S.M., Zierath, J.R., 2021. Metabolic consequences of  
838 obesity and type 2 diabetes: Balancing genes and environment for personalized care. *Cell*  
839 184, 1530–1544. <https://doi.org/10.1016/J.CELL.2021.02.012>
- 840 Poss, A.M., Summers, S.A., 2020. Too Much of a Good Thing? An Evolutionary Theory to  
841 Explain the Role of Ceramides in NAFLD. *Front. Endocrinol. (Lausanne)*. 11.  
842 <https://doi.org/10.3389/FENDO.2020.00505>
- 843 Rajak, S., Raza, S., Tewari, A., Sinha, R.A., 2021. Environmental Toxicants and NAFLD: A  
844 Neglected yet Significant Relationship. *Dig. Dis. Sci.* <https://doi.org/10.1007/S10620-021-07203-Y>
- 846 Régnier, M., Gourbeyre, P., Pinton, P., Napper, S., Laffite, J., Cossalter, A.-M., Bailly, J.-D.,  
847 Lippi, Y., Bertrand-Michel, J., Bracarense, A.P.F.R.L., Guillou, H., Loiseau, N., Oswald,  
848 I.P., 2017. Identification of Signaling Pathways Targeted by the Food Contaminant FB1:  
849 Transcriptome and Kinome Analysis of Samples from Pig Liver and Intestine. *Mol. Nutr.*  
850 *Food Res.* 61, 1700433. <https://doi.org/10.1002/mnfr.201700433>
- 851 Régnier, M., Polizzi, A., Guillou, H., Loiseau, N., 2019a. Sphingolipid metabolism in non-  
852 alcoholic fatty liver diseases. *Biochimie* 159, 9–22.  
853 <https://doi.org/10.1016/J.BIOCHI.2018.07.021>

854 Régnier, M., Polizzi, A., Lukowicz, C., Smati, S., Lasserre, F., Lippi, Y., Naylies, C., Laffitte,  
855 J., Bétoulières, C., Montagner, A., Ducheix, S., Gourbeyre, P., Ellero-Simatos, S.,  
856 Menard, S., Bertrand-Michel, J., Al Saati, T., Lobaccaro, J.M., Burger, H.M.,  
857 Gelderblom, W.C., Guillou, H., Oswald, I.P., Loiseau, N., 2019b. The protective role of  
858 liver X receptor (LXR) during fumonisin B1-induced hepatotoxicity. *Arch. Toxicol.* 93,  
859 505–517. <https://doi.org/10.1007/S00204-018-2345-2>

860 Régnier, M., Polizzi, A., Smati, S., Lukowicz, C., Fougerat, A., Lippi, Y., Fouché, E., Lasserre,  
861 F., Naylies, C., Bétoulières, C., Barquissau, V., Mouisel, E., Bertrand-Michel, J., Batut,  
862 A., Saati, T. Al, Canlet, C., Tremblay-Franco, M., Ellero-Simatos, S., Langin, D., Postic,  
863 C., Wahli, W., Loiseau, N., Guillou, H., Montagner, A., 2020. Hepatocyte-specific  
864 deletion of Ppara promotes NAFLD in the context of obesity. *Sci. Reports* 2020 101 10,  
865 1–15. <https://doi.org/10.1038/s41598-020-63579-3>

866 Riley, R.T., An, N.H., Showker, J.L., Yoo, H.S., Norred, W.P., Chamberlain, W.J., Wang, E.,  
867 Merrill, A.H., Motelin, G., Beasley, V.R., 1993. Alteration of tissue and serum  
868 sphinganine to sphingosine ratio: an early biomarker of exposure to fumonisin-containing  
869 feeds in pigs. *Toxicol. Appl. Pharmacol.* 118, 105–12.

870 Riley, R.T., Enongene, E., Voss, K.A., Norred, W.P., Meredith, F.I., Sharma, R.P., Spitsbergen,  
871 J., Williams, D.E., Carlson, D.B., Merrill, A.H., Jr, 2001. Sphingolipid perturbations as  
872 mechanisms for fumonisin carcinogenesis. *Environ. Health Perspect.* 109 Suppl 2, 301–  
873 8.

874 Rohm, T. V., Meier, D.T., Olefsky, J.M., Donath, M.Y., 2022. Inflammation in obesity,  
875 diabetes, and related disorders. *Immunity* 55, 31–55.  
876 <https://doi.org/10.1016/J.IMMUNI.2021.12.013>

- 877 Rohr, M.W., Narasimhulu, C.A., Rudeski-Rohr, T.A., Parthasarathy, S., 2020. Negative Effects  
878 of a High-Fat Diet on Intestinal Permeability: A Review. *Adv. Nutr.* 11, 77–91.  
879 <https://doi.org/10.1093/ADVANCES/NMZ061>
- 880 Sharpton, S.R., Yong, G.J.M., Terrault, N.A., Lynch, S. V., 2019. Gut Microbial Metabolism  
881 and Nonalcoholic Fatty Liver Disease. *Hepatol. Commun.* 3, 29–43.  
882 <https://doi.org/10.1002/HEP4.1284>
- 883 Suez, J., Korem, T., Zeevi, D., Zilberman-Schapira, G., Thaiss, C.A., Maza, O., Israeli, D.,  
884 Zmora, N., Gilad, S., Weinberger, A., Kuperman, Y., Harmelin, A., Kolodkin-Gal, I.,  
885 Shapiro, H., Halpern, Z., Segal, E., Elinav, E., 2014. Artificial sweeteners induce glucose  
886 intolerance by altering the gut microbiota. *Nat.* 2014 5147521 514, 181–186.  
887 <https://doi.org/10.1038/NATURE13793>
- 888 Sun, J., Fang, R., Wang, H., Xu, D.X., Yang, J., Huang, X., Cozzolino, D., Fang, M., Huang,  
889 Y., 2022. A review of environmental metabolism disrupting chemicals and effect  
890 biomarkers associating disease risks: Where exposomics meets metabolomics. *Environ.*  
891 *Int.* 158. <https://doi.org/10.1016/J.ENVINT.2021.106941>
- 892 Tamura, S., Shimomura, I., 2005. Contribution of adipose tissue and de novo lipogenesis to  
893 nonalcoholic fatty liver disease. *J. Clin. Invest.* 115, 1139–1142.  
894 <https://doi.org/10.1172/JCI24930>
- 895 Tang, Y., Ren, Q., Wen, Q., Yu, C., Xie, X., Hu, Q., Du, Y., 2019. Effect of methyl tert-butyl  
896 ether on adipogenesis and glucose metabolism in vitro and in vivo. *J. Environ. Sci.* 85,  
897 208–219. <https://doi.org/10.1016/J.JES.2019.06.015>
- 898 Tao, Y., Xie, S., Xu, F., Liu, A., Wang, Y., Chen, D., Pan, Y., Huang, L., Peng, D., Wang, X.,  
899 Yuan, Z., 2018. Ochratoxin A: Toxicity, oxidative stress and metabolism. *Food Chem.*  
900 *Toxicol.* 112, 320–331. <https://doi.org/10.1016/J.FCT.2018.01.002>

901 Terciolo, C., Bracarense, A.P., Souto, P.C.M.C., Cossalter, A.M., Dopavogui, L., Loiseau, N.,  
902 Oliveira, C.A.F., Pinton, P., Oswald, I.P., 2019. Fumonisin at Doses below EU  
903 Regulatory Limits Induce Histological Alterations in Piglets. *Toxins* (Basel). 11.  
904 <https://doi.org/10.3390/TOXINS11090548>

905 Todoric, J., Di Caro, G., Reibe, S., Henstridge, D.C., Green, C.R., Vrbanac, A., Ceteci, F.,  
906 Conche, C., McNulty, R., Shalpour, S., Taniguchi, K., Meikle, P.J., Watrous, J.D.,  
907 Moranchel, R., Najhawan, M., Jain, M., Liu, X., Kisseleva, T., Diaz-Meco, M.T., Moscat,  
908 J., Knight, R., Greten, F.R., Lau, L.F., Metallo, C.M., Febbraio, M.A., Karin, M., 2020.  
909 Fructose stimulated de novo lipogenesis is promoted by inflammation. *Nat. Metab.* 2,  
910 1034–1045. <https://doi.org/10.1038/S42255-020-0261-2>

911 Torres, M.C.P., Bodini, G., Furnari, M., Marabotto, E., Zentilin, P., Giannini, E.G., 2020. Nuts  
912 and Non-Alcoholic Fatty Liver Disease: Are Nuts Safe for Patients with Fatty Liver  
913 Disease? *Nutr.* 2020, Vol. 12, Page 3363 12, 3363. <https://doi.org/10.3390/NU12113363>

914 Veselkov, K.A., Lindon, J.C., Ebbels, T.M.D., Crockford, D., Volynkin, V. V., Holmes, E.,  
915 Davies, D.B., Nicholson, J.K., 2009. Recursive segment-wise peak alignment of  
916 biological (1)h NMR spectra for improved metabolic biomarker recovery. *Anal. Chem.*  
917 81, 56–66. <https://doi.org/10.1021/AC8011544>

918 Wang, B., Tsakiridis, E.E., Zhang, S., Llanos, A., Desjardins, E.M., Yabut, J.M., Green, A.E.,  
919 Day, E.A., Smith, B.K., Lally, J.S.V., Wu, J., Raphenya, A.R., Srinivasan, K.A.,  
920 McArthur, A.G., Kajimura, S., Patel, J.S., Wade, M.G., Morrison, K.M., Holloway, A.C.,  
921 Steinberg, G.R., 2021. The pesticide chlorpyrifos promotes obesity by inhibiting diet-  
922 induced thermogenesis in brown adipose tissue. *Nat. Commun.* 2021 12 12, 1–12.  
923 <https://doi.org/10.1038/s41467-021-25384-y>

- 924 Wang, E., Norred, W.P., Bacon, C.W., Riley, R.T., Merrill, A.H., 1991. Inhibition of  
925 sphingolipid biosynthesis by fumonisins. Implications for diseases associated with  
926 *Fusarium moniliforme*. *J. Biol. Chem.* 266, 14486–90.
- 927 Wang, N., Wu, W., Pan, J., Long, M., 2019. Detoxification Strategies for Zearalenone Using  
928 Microorganisms: A Review. *Microorg.* 2019, Vol. 7, Page 208 7, 208.  
929 <https://doi.org/10.3390/MICROORGANISMS7070208>
- 930 Wangia-Dixon, R.N., Nishimwe, K., 2021. Molecular toxicology and carcinogenesis of  
931 fumonisins: a review. <https://doi.org/10.1080/26896583.2020.1867449> 39, 44–67.  
932 <https://doi.org/10.1080/26896583.2020.1867449>
- 933 Xia, J.Y., Holland, W.L., Kusminski, C.M., Sun, K., Sharma, A.X., Pearson, M.J., Sifuentes,  
934 A.J., McDonald, J.G., Gordillo, R., Scherer, P.E., 2015. Targeted Induction of Ceramide  
935 Degradation Leads to Improved Systemic Metabolism and Reduced Hepatic Steatosis.  
936 *Cell Metab.* 22, 266–278. <https://doi.org/10.1016/J.CMET.2015.06.007>
- 937 Yueh, M.F., He, F., Chen, C., Vu, C., Tripathi, A., Knight, R., Karin, M., Chen, S., Tukey,  
938 R.H., 2020. Triclosan leads to dysregulation of the metabolic regulator FGF21  
939 exacerbating high fat diet-induced nonalcoholic fatty liver disease. *Proc. Natl. Acad. Sci.*  
940 *U. S. A.* 117, 31259–31266. [https://doi.org/10.1073/PNAS.2017129117/-](https://doi.org/10.1073/PNAS.2017129117/-/DCSUPPLEMENTAL)  
941 [/DCSUPPLEMENTAL](https://doi.org/10.1073/PNAS.2017129117/-/DCSUPPLEMENTAL)
- 942



943 **FIGURE LEGENDS**

944 **Figure 1. FB1 exposure reverses the effect of HFD on body weight and fasting glucose.**

945 C57BL/6J male mice were fed a control diet (CHOW) or a high-fat diet (HFD) for 15  
946 weeks. During the final three weeks, FB1 (10 mg/kg bw/day) was added or not to the drinking  
947 water. (A) Mean body weight measured weekly during the study period. (B) Average food  
948 intake during the 3 weeks of FB1 exposure. (C) Average water intake during the 3 weeks of  
949 FB1 exposure (D) Average FB1 exposure. (E) Fasting glycemia after 2 weeks of FB1 treatment.  
950 (F) Insulin levels in the fed state after 3 weeks of FB1 treatment. (G) FB1 level in the plasma.  
951 Results are the mean  $\pm$  SEM (n=12/group and each level correspond to the pooling of 4 mouse  
952 samples). # diet effect, \* treatment effect. \* or # p-value<0.05, \*\* or ## p-value<0.01, \*\*\* or  
953 ### p-value<0.001; FB1: fumonisin B1; CTRL: not exposed to FB1

954 **Figure 2. FB1 effects on gut microbiota composition**

955 C57BL/6J male mice were fed a control diet (CHOW) or a high-fat diet (HFD) for 15  
956 weeks. During the final three weeks, FB1 (10 mg/kg bw/day) was added or not to the drinking  
957 water. The cecal microbial composition of samples was analyzed by sequencing 16S rRNA  
958 genes. (A) Alpha diversity was assessed by calculating the Shannon and Simpson indexes. (B)  
959 Relative frequencies of taxa at the phylum level. (C) Beta diversity was assessed with the Bray-  
960 Curtis and unweighted unifracs dissimilarity indexes and distances between individuals within  
961 and between groups were compared. (D) PCoA plot of beta-diversity using the Bray Curtis  
962 index. (E) PCoA plot of beta-diversity using the unweighted unifracs index. (F) General linear  
963 models were fitted to find OTUs significantly different between the experimental groups. Venn  
964 diagram representing the number of significant OTUs higher (red) or lower (blue) in FB1- vs.  
965 CTRL groups. (G) Hierarchical clustering of the OTUs significantly different between FB1 and  
966 CTRL mice in either CHOW- or HFD-fed mice. (H) Relative abundance of one representative  
967 OTU from each cluster. Data are presented as the mean  $\pm$  SEM (n=12/group). #diet effect,

968 \*treatment effect; \* or # p-value<0.05, \*\* or ## p-value<0.01, \*\*\* or ### p-value<0.001; FB1:  
969 Fumonisin B1; CTRL: not exposed to FB1; PCoA: principle coordinates analysis  
970

971 **Figure 3. FB1 reverses HFD-induced hepatic steatosis, but promotes liver inflammation.**

972 C57BL/6J male mice were fed a control diet (CHOW) or a high-fat diet (HFD) for 15  
973 weeks. During the final three weeks, FB1 (10 mg/kg bw/day) was added or not to the drinking  
974 water. (A) Representative histological liver sections from mice in each group stained with  
975 hematoxylin and eosin; magnification  $\times 100$ . Scale bars: 50  $\mu\text{m}$ . (B) Average liver weight,  
976 expressed as a percentage of body weight. (C) Liver steatosis scores, estimated on liver sections.  
977 Scoring: the severity of parenchymal steatosis depended on the percentage of liver cells that  
978 contained fat: Grade 0: no hepatocytes with steatosis in any section; grade 1: 1–25% of  
979 hepatocytes with steatosis; grade 2: 26–50% of hepatocytes with steatosis; grade 3: 51–75% of  
980 hepatocytes with steatosis, and grade 4: 76–100% of hepatocytes with steatosis (n=12/group).  
981 (D-F) Lipids were extracted from livers and quantified with gas-liquid chromatography: (D)  
982 triglycerides, (E) free cholesterol, and (F) esterified cholesterol. (G) Inflammatory scores: liver  
983 sections were analyzed in 10 microscopic fields (200 $\times$  magnification) to determine the mean  
984 number of inflammatory foci per field (n=12 per group). (H-I) mRNA expression levels of  
985 genes that encode cytokines involved in inflammation: (H) *Tnfa* and (I) *Ccl2*. (J-M) End of  
986 experiment plasma levels of (J) aspartate aminotransferase (AST), (K) alanine aminotransferase  
987 (ALT), (L) alkaline phosphatase (ALP), and (M) bilirubin. Results are presented as the mean  $\pm$   
988 SEM. #diet effect, \*treatment effect; \* or # p-value< 0.05, \*\* or ## p-value<0.01, \*\*\* or ###  
989 p-value<0.001; FB1: Fumonisin B1; CTRL: not exposed to FB1

990 **Figure 4. FB1 effects on sphingolipid homeostasis.**

991 C57BL/6J male mice were fed a control diet (CHOW) or a high-fat diet (HFD) for 15  
992 weeks. During the final three weeks, FB1 (10 mg/kg bw/day) was added or not to the drinking  
993 water. We analyzed liver samples for the levels of (A) sphinganine, (B) sphingosine, (C) the  
994 sphinganine/sphingosine ratio (Sa/So), (D) sphingosine-1-phosphate, (E) total ceramides, (F)  
995 dihydroceramides, (G) sphingomyelins, and (H) dihydrosphingomyelins. (I-L) To evaluate the  
996 abundances of sphingolipids as a function of the length of the fatty acid residue, we performed  
997 separate measurements of (I) ceramide, (J) dihydroceramide, (K) sphingomyelin, and (L)  
998 dihydrosphingomyelin species. Results are presented as the mean  $\pm$  SEM. #diet effect,  
999 \*treatment effect. \* or # p-value < 0.05, \*\* or ## p-value < 0.01, \*\*\* or ### p-value < 0.001; FB1:  
1000 Fumonisin B1; CTRL: not exposed to FB1

1001 **Figure 5. FB1 effects on the metabolomic profile of the liver.**

1002 C57BL/6J male mice were fed a control diet (CHOW) or a high-fat diet (HFD) for 15  
1003 weeks. During the final three weeks, FB1 (10 mg/kg bw/day) was added or not to the drinking  
1004 water. (A-B) O-PLS-DA score plots derived from the <sup>1</sup>H-NMR metabolomic profiles of liver  
1005 aqueous extracts from CHOW (A) or HFD (B)-fed mice. Each dot represents an animal. (C)  
1006 Coefficient plots related to the O-PLS-DA models discriminating between HFD alone  
1007 (HFD\_CTRL) and HFD combined with FB1 exposure (HFD\_FB1). Metabolites are color-  
1008 coded according to their correlation coefficient. The direction of the metabolite peak indicates  
1009 the group with which it was positively associated, as labeled on the diagram. (D-N) Areas under  
1010 the curves for several discriminant metabolites selected using the previous O-PLS-DA model.  
1011 Additional 2-way ANOVAs confirmed significant differences in metabolite levels  
1012 (n=12/group). Results are presented as the mean  $\pm$  SEM. #diet effect, \*treatment effect. \* or #  
1013 p-value < 0.05, \*\* or ## p-value < 0.01, \*\*\* or ### p-value < 0.001; FB1: Fumonisin B1; CTRL:

1014 not exposed to FB1; O-PLS-DA: orthogonal projection on latent structure-discriminant  
1015 analysis; GPC: glycerophosphocholine.

1016

1017 **Figure 6. FB1 effects on liver gene expression.**

1018 C57BL/6J male mice were fed a control diet (CHOW) or a high-fat diet (HFD) for 15  
1019 weeks. During the final three weeks, FB1 (10 mg/kg bw/day) was added or not to the drinking  
1020 water. Gene expression profiles were analyzed in liver samples with Agilent microarrays  
1021 (n=6/group). (A) Principal component analysis (PCA) score plots of whole-liver transcriptome  
1022 datasets (n=6/group). Each dot represents an observation (animal), projected onto first  
1023 (horizontal axis) and second (vertical axis) PCA variables. (B) Volcano plot shows FB1 effects  
1024 on gene expression under a CHOW diet (left panel) or an HFD (right panel). Each gene  
1025 expression level is shown in terms of the  $-\log_{10}$  p-value, for comparisons between the FB1  
1026 exposed group and the unexposed (CTRL) group for each diet. The  $-\log_{10}$  p-values are plotted  
1027 as a function of the associated  $\log_2$ -fold change, or formally,  $\log_2(\text{FB1})-\log_2(\text{CTRL})$ . The  
1028 green points have p-values  $<0.05$ . Gene names are highlighted for the most highly regulated  
1029 genes, according to a score based on the adjusted p-value  $\times$  logFC. (C) Venn diagram represents  
1030 the number of genes significantly regulated by FB1 exposure for each diet. (D) Heatmap  
1031 represents data from microarray experiments. The significantly differentially expressed genes  
1032 (adjusted p-values  $<0.05$ ) were selected, and they corresponded to 11,920 probes. The color  
1033 gradient indicates the scaled values of gene expression. Hierarchical clustering identified six  
1034 gene clusters (indicated on the left). (E) Mean expression profiles for the six gene clusters.  
1035 Graphs represent the means of the scaled gene expression values. Error bars are standard  
1036 deviations. The most significantly enriched biological processes identified with the Metascape  
1037 gene ontology algorithm are shown at the right of each profile. Briefly, hypergeometric tests  
1038 were performed for each category in each cluster. The size of the font is related to a score based

1039 on the log base 2 number of genes enriched, and the color gradients of the characters represent  
1040 the  $-\log$  base 10 value of the probability of the test for  $P[X > x]$ . (F) Representation of the top  
1041 20 genes in each cluster that showed the largest differences in expression. The color of each  
1042 character string is related to the sum of the  $-\log_{10}$ (adjusted p-value), and the size of each  
1043 character string is related to the sum of the absolute  $\log_2$ FC values for all the comparisons made  
1044 for each gene.  
1045

**A**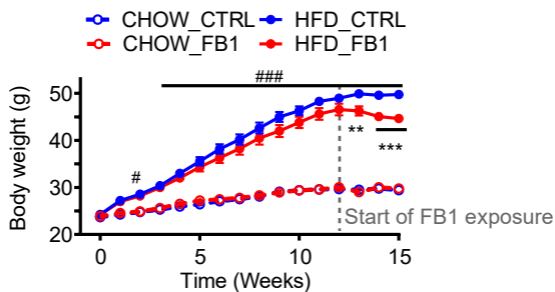**B**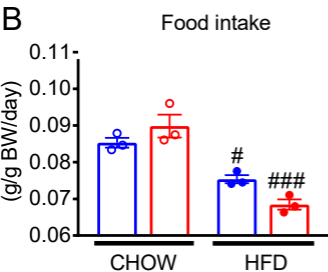**C**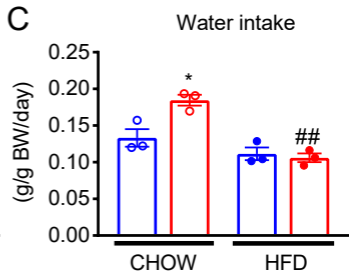**D**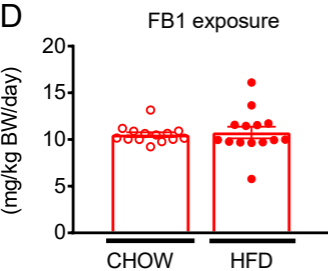**E**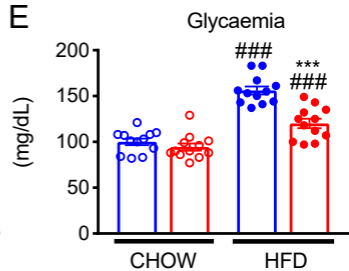**F**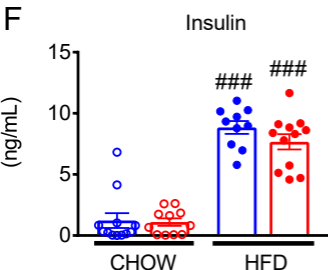**G**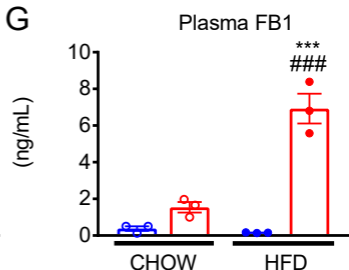

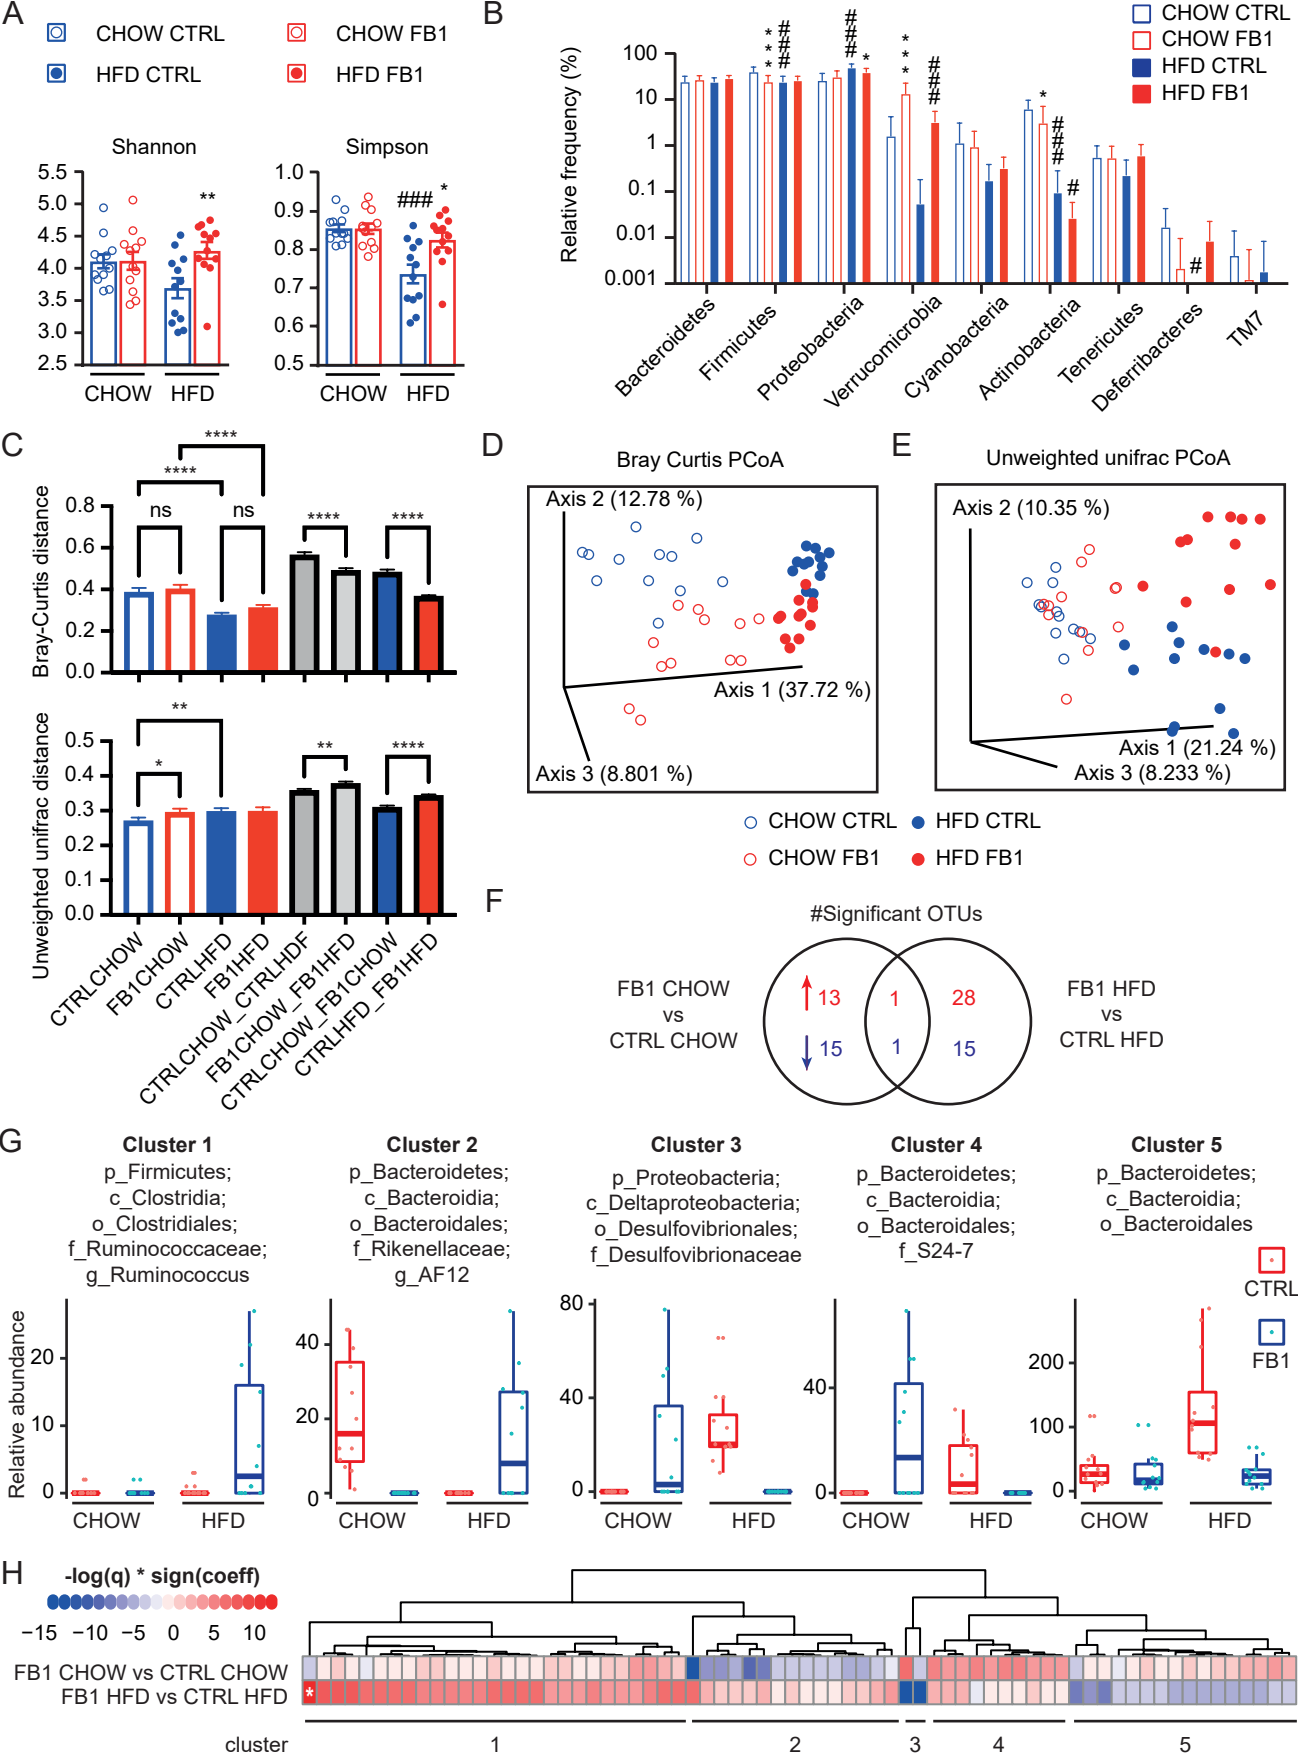

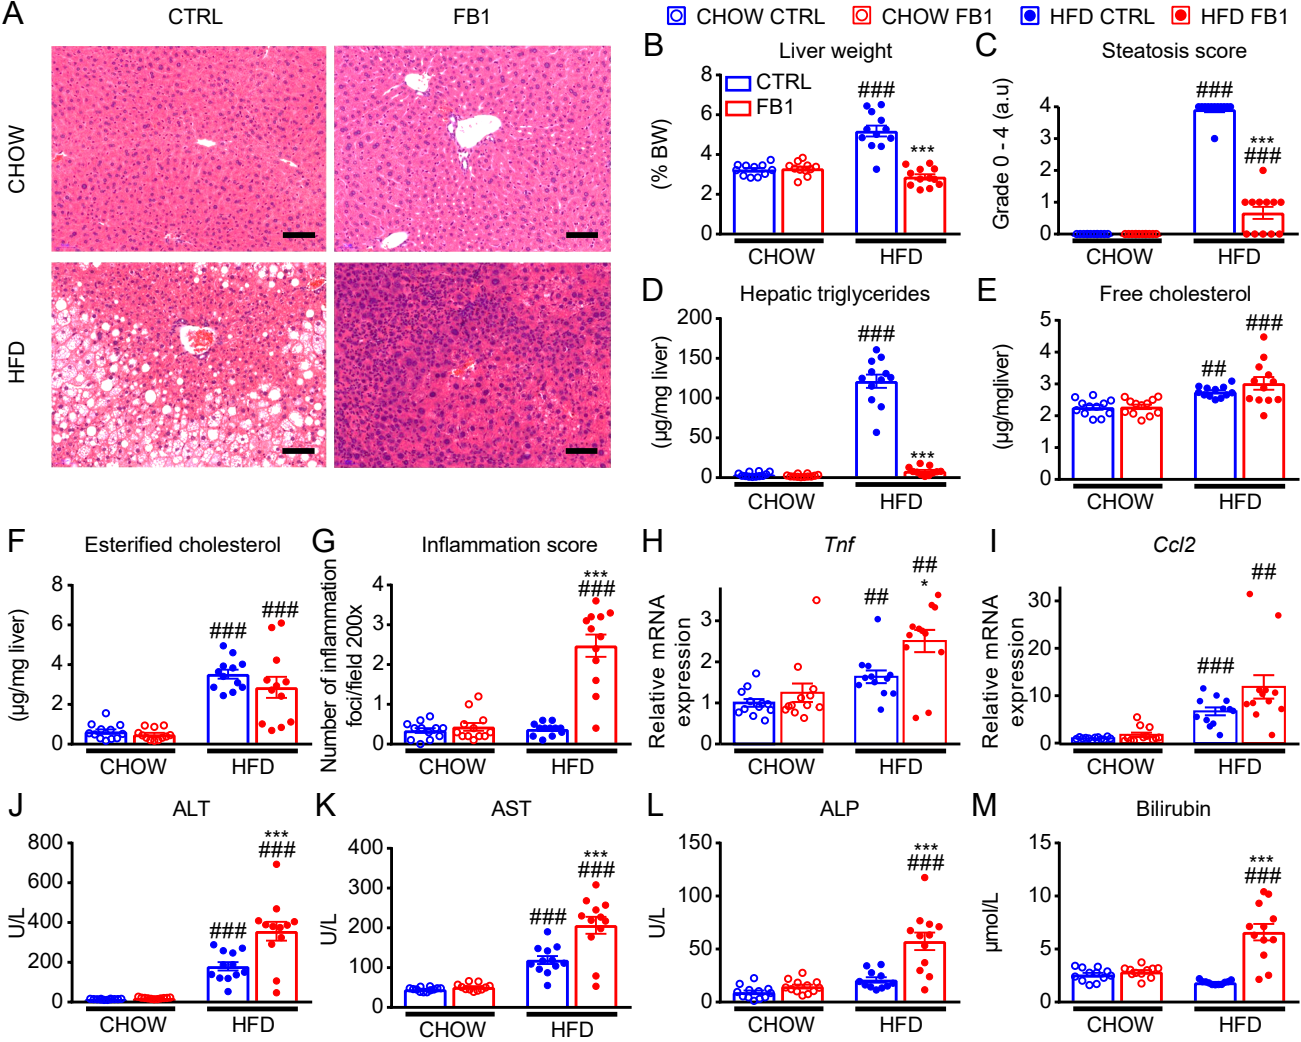



□ CHOW CTRL    □ CHOW FB1

● HFD CTRL    ● HFD FB1

■ HFD CTRL    ■ HFD FB1

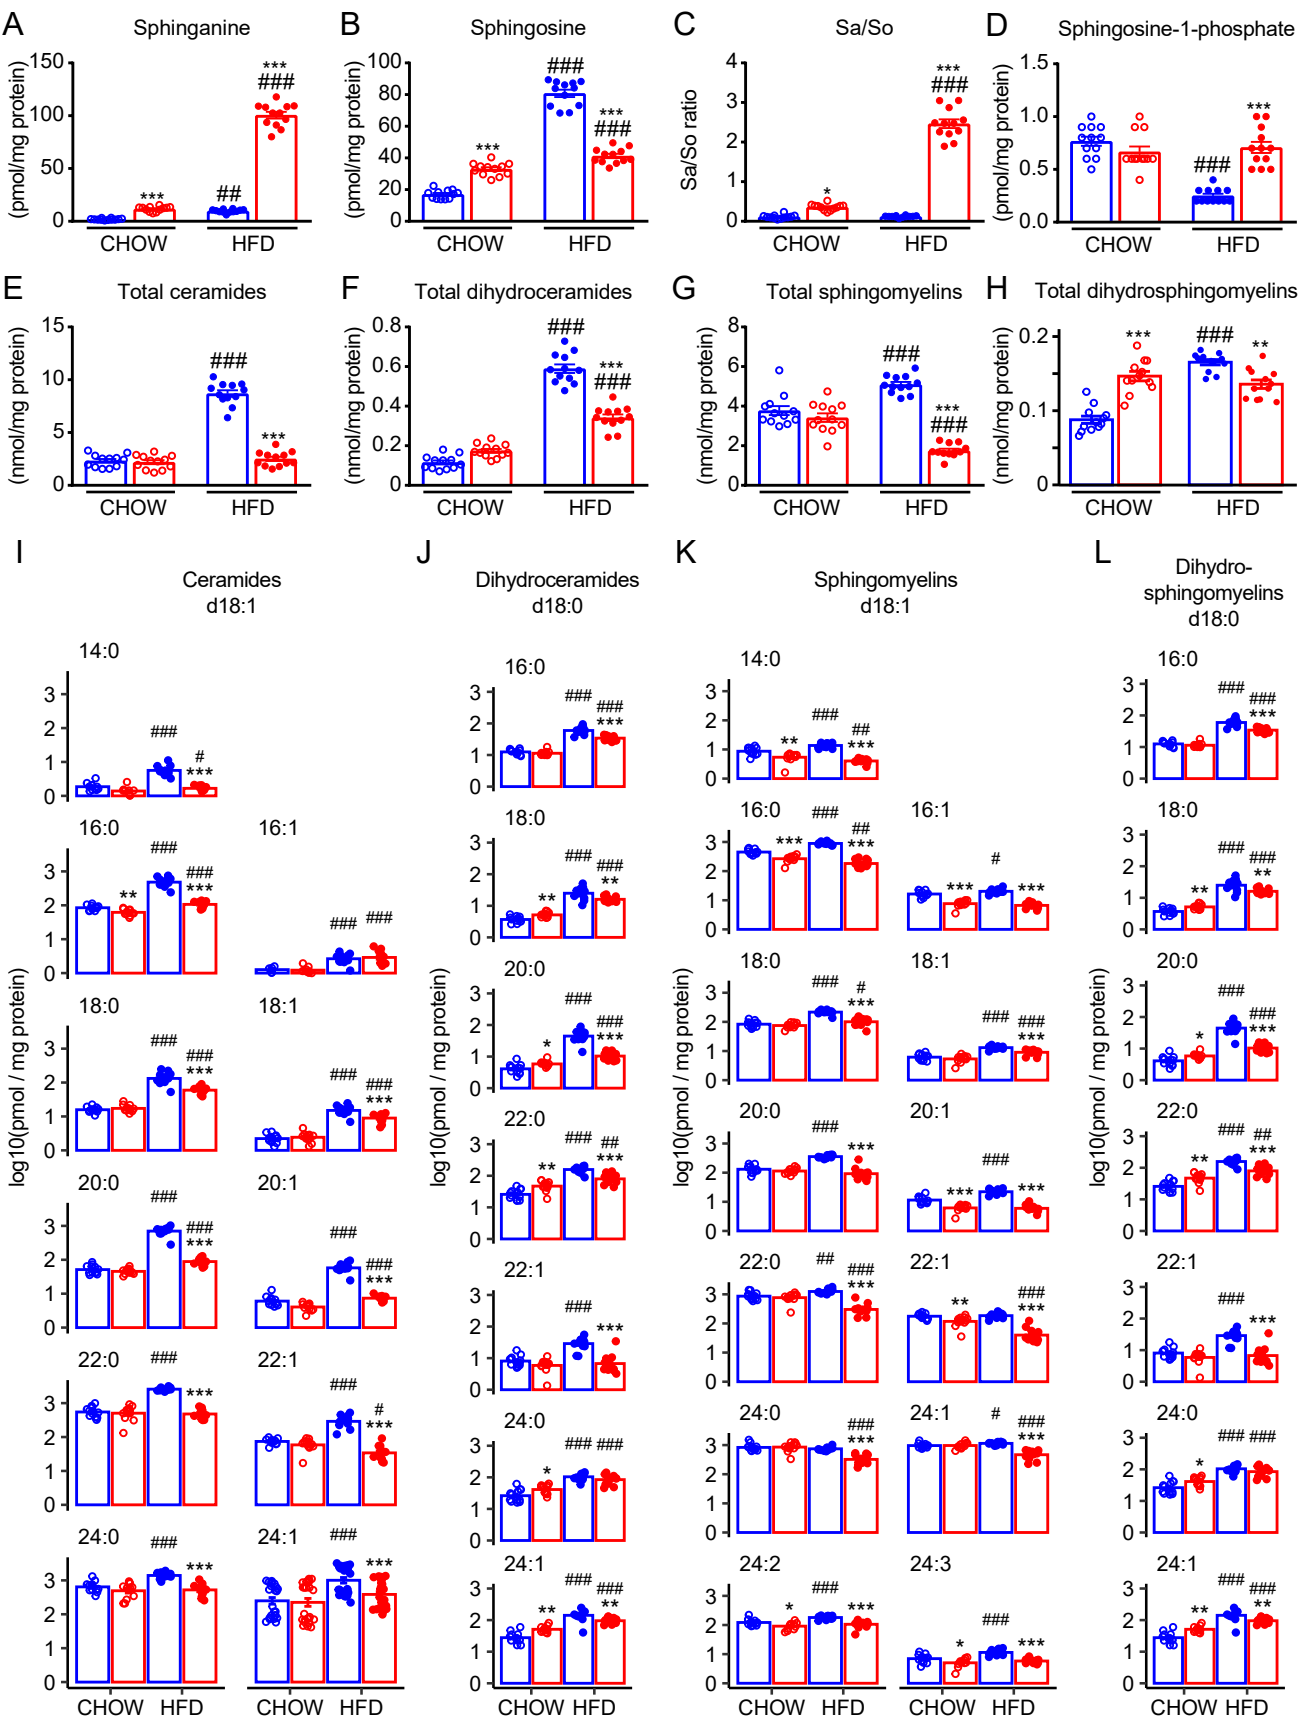

**A** ○ CHOW CTRL ○ CHOW FB1  
O-PLS model,  $Q^2 < 0$ ,  $p = 0.6$

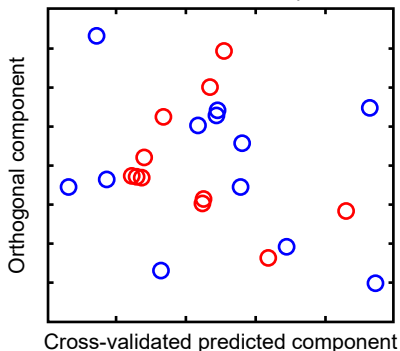

**B** ● HFD CTRL ● HFD FB1  
O-PLS model,  $Q^2 < 0.78$ ,  $p = 0.001$

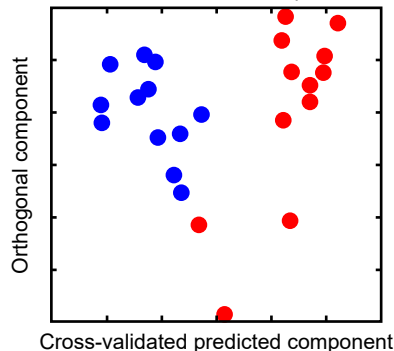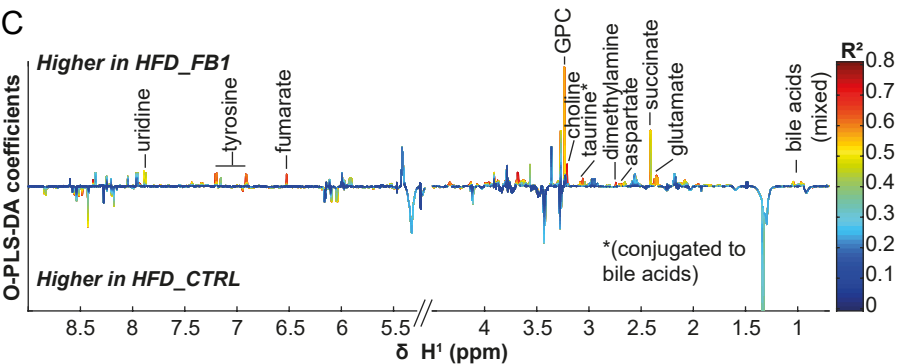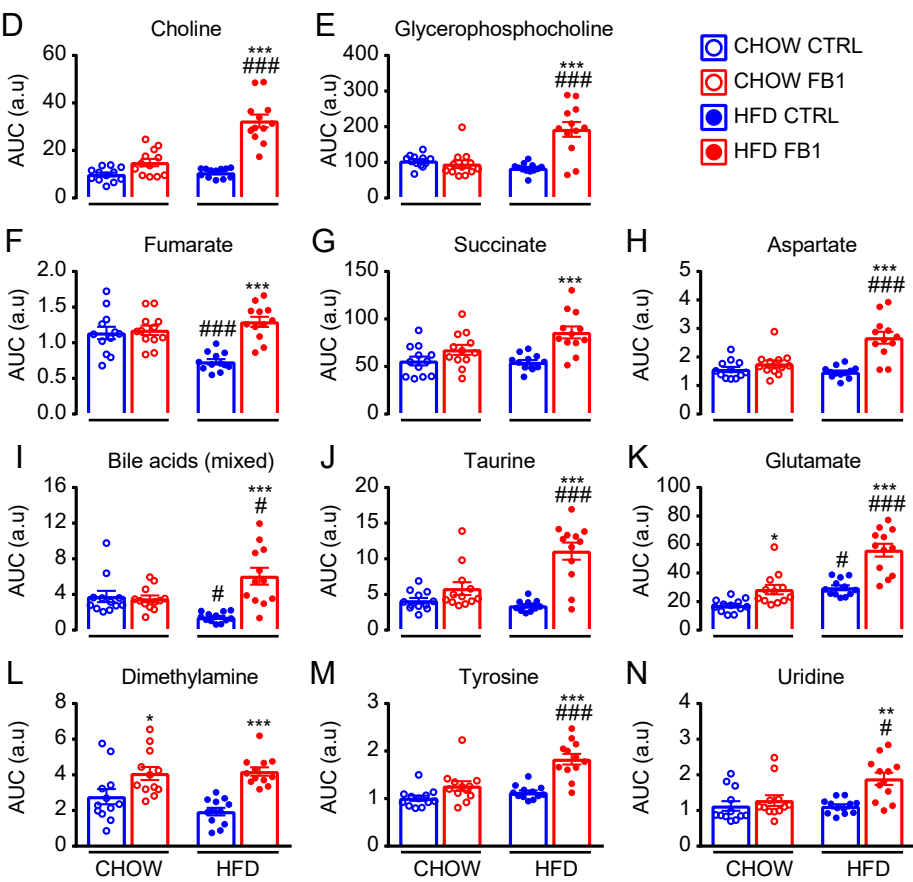

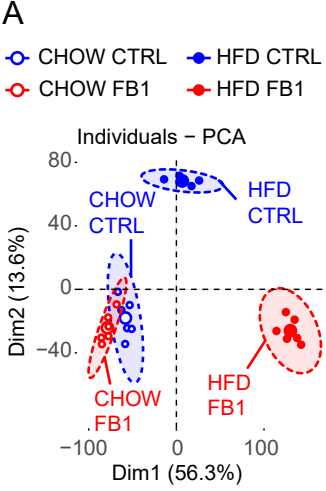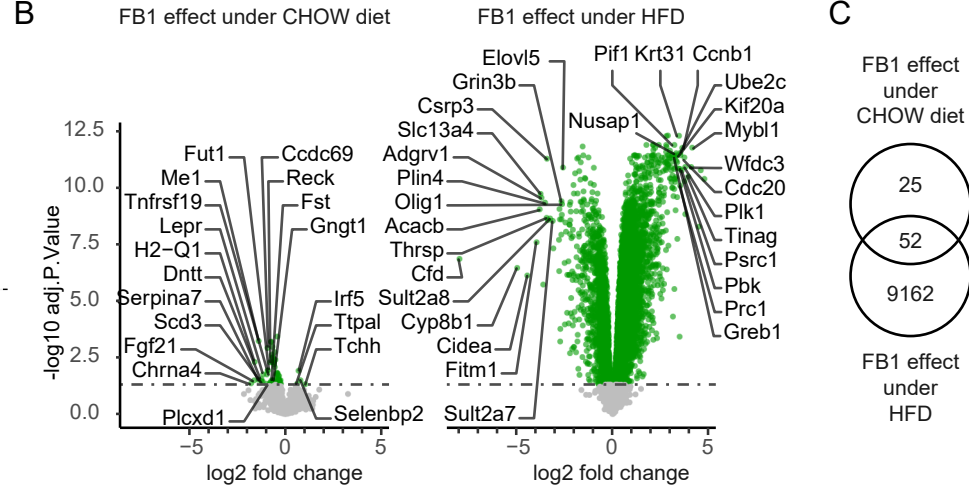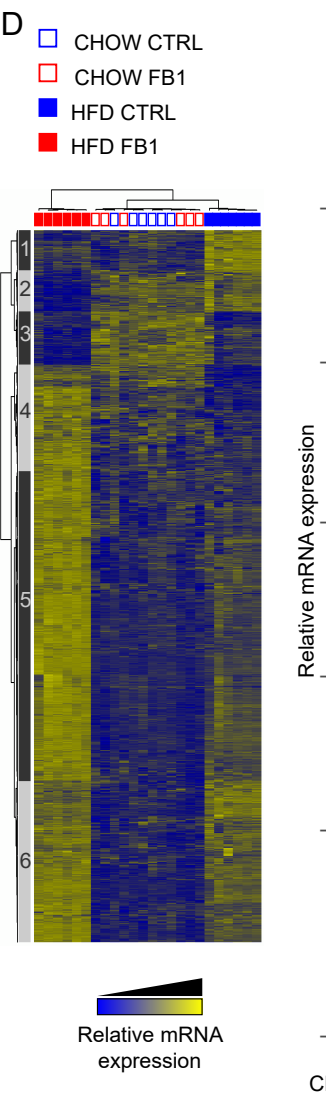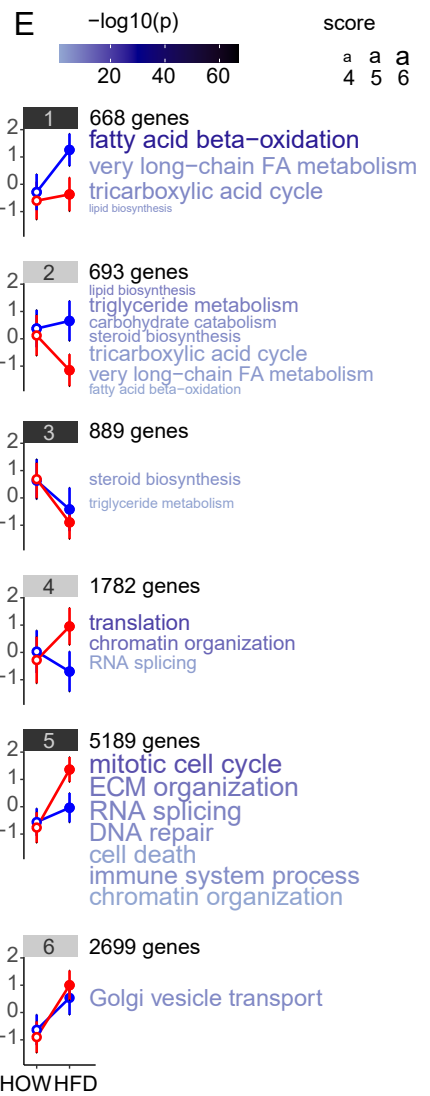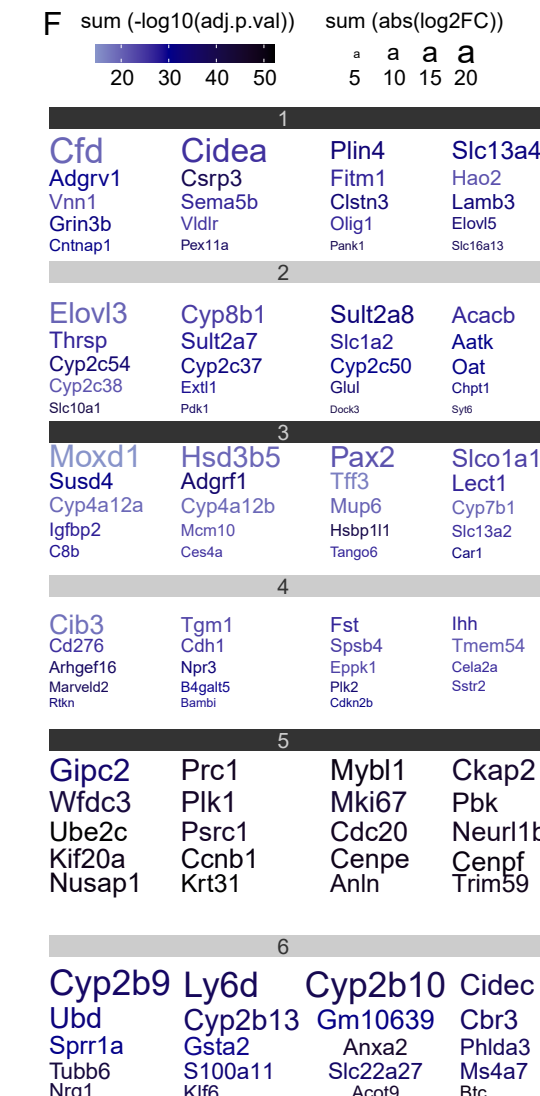

Source: https://www.biorxiv.org/content/10.1101/2022.07.22.500801v2.full.pdf
