# Supplementary material for: Obesity promotes Fumonisin B1 toxicity and induces hepatitis
Source: bioRxiv or medRxiv preprint supplement (doi:10.1101/2022.07.22.500801), 2022-07-26

◻ CHOW CTRL   
 ◻ CHOW FB1   
 ◻ HFD CTRL   
 ◻ HFD FB1

\* : FB1 effect  
 # : HFD effect  
 adj.p < 0.05

A

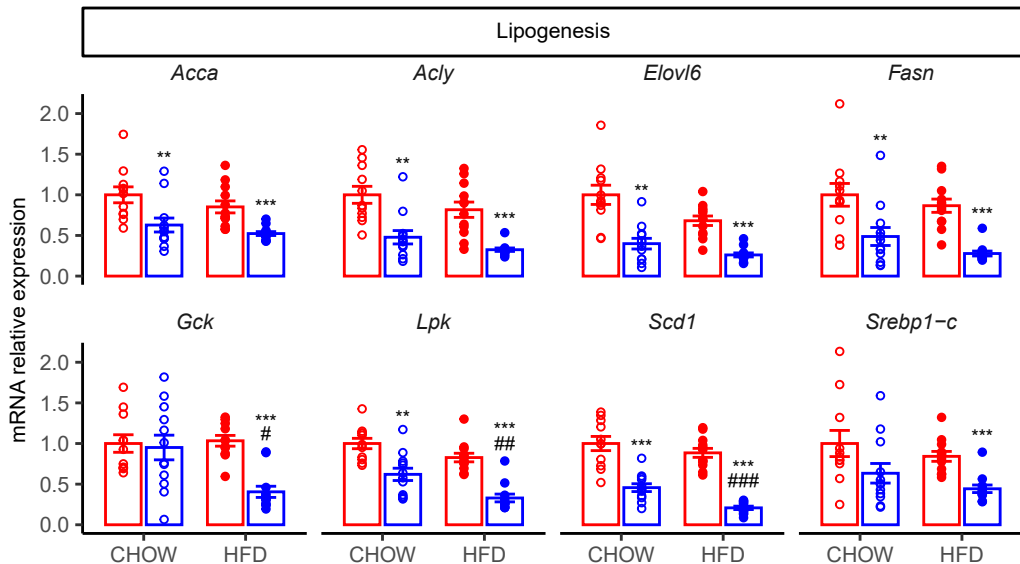

B

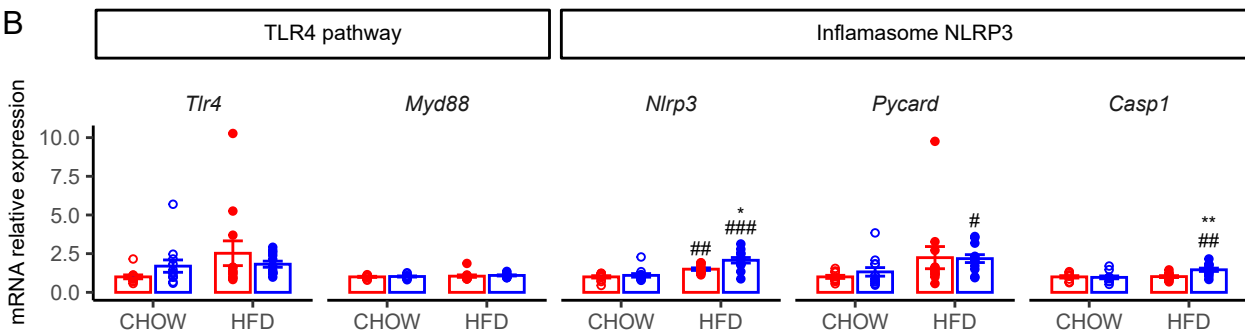

C

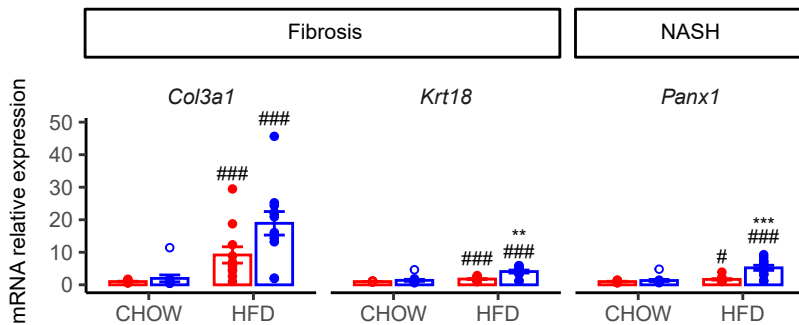

Supplement: Supplementary file [file media-3.pdf]
