# Supplementary material for: Obesity promotes Fumonisin B1 toxicity and induces hepatitis
Source: bioRxiv or medRxiv preprint supplement (doi:10.1101/2022.07.22.500801), 2022-07-26

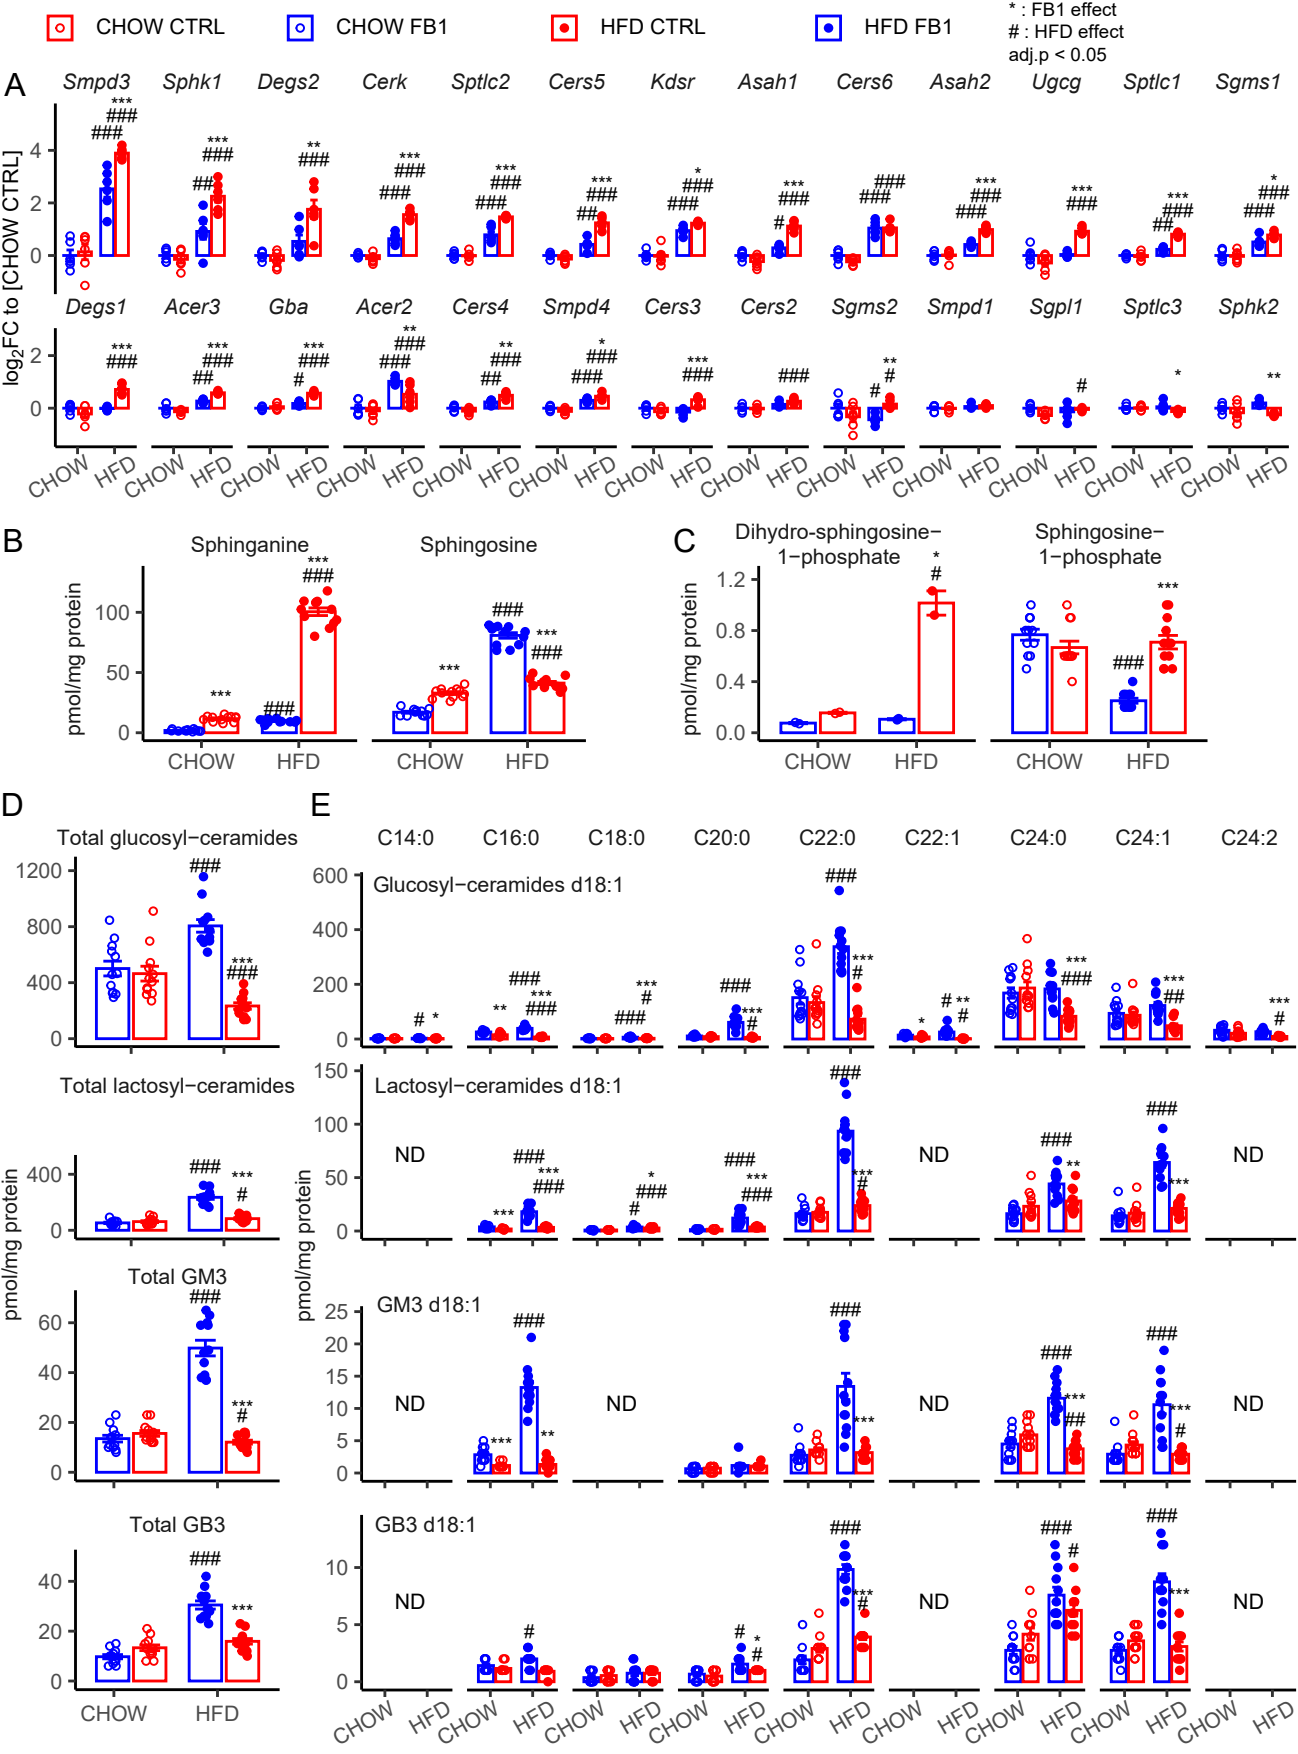

Supplement: Supplementary file [file media-4.pdf]
